# Supplementary material
Source: PubMed Central journal article supplement (PMC4947447)

## SUPPLEMENTARY DOCUMENTS

### Clinical and biologic significance of *MYC* genetic mutations in *de novo* diffuse large B-cell lymphoma

#### CONTENTS

#### 1. Materials and Methods

Page 2-4

Details for detection of *MYC* mutations and rearrangements, assessment of Myc expression, and functional studies

#### 2. Supplementary Tables

Page 5-24

**Supplementary Table S1.** Numbers of *MYC* mutation present in the coding sequence and the untranslated regions

**Supplementary Table S2.** Clinical and molecular characteristics of the DLBCL cohort with wild-type or mutated Myc or N11S single nucleotide polymorphism

**Supplementary Table S3.** List of Myc mutations and corresponding patient survival

**Supplementary Table S4.** Multivariate survival analysis

**Supplementary Table S5.** Molecular characteristics of patients with wild-type or mutated *MYC* untranslated regions

**Supplementary Table S6.** List of *MYC* 3'UTR mutations and corresponding patient survival

**Supplementary Table S7.** Gene profiling comparisons between wild-type and mutated *MYC*

**Supplementary Table S8.** Brief summary of major findings by this study

#### 3. Legends for Supplementary Figures

Page 25-29

**Supplementary Figure S1.** Survival analysis for *MYC* mutations in DLBCL respective to GCB/ABC subtypes, homo/heterozygosity, and *MYC* translocations

**Supplementary Figure S2.** Comparison of Myc levels and gene expression profiles between DLBCL groups.

**Supplementary Figure S3.** Differential expression of genes between the *WT-Myc* and *MUT-Myc* groups.

**Supplementary Figure S4.** Comparison of gene expression between the *WT-Myc* and *MUT-Myc* groups.

**Supplementary Figure S5.** Differential expression of proteins between the *WT-Myc* and *MUT-Myc* groups

## **MATERIALS AND METHODS**

### **Detection of *MYC* Mutations**

Genomic DNAs of the 750 patients were extracted from formalin-fixed and paraffin-embedded tissues using an Invitrogen PureLink genomic DNA kit. All three exons and four splicing sites of the *MYC* gene were resequenced for each patient using the Sanger sequencing method. Totally 11 short *MYC* amplicons were generated by two-step “nested” polymerase chain reaction (to increase the specificity) and used as templates for sequencing. The amplicon products were separately sequenced using either the forward or reverse inside polymerase chain reaction primer as a sequencing primer and the ABI BigDye 3.1 reagents with an ABI 3730xl DNA sequencer (Applied Biosystems). Generated electropherogram results were aligned and analyzed, and any divergence from the reference sequence (NG\_007161.1) in the Genebank (NC\_000008.10) was noted and scored with a Quality Score (QS, similar to a Phred value) for variation validation. To account for heterozygous variations, the cutoff of QS was set as 17 (corresponding to a calling confidence of 98%). Using the same methods, we also sequenced the CDS or UTR regions of *AKT1*, *BCL6*, *CD58*, *CDKN2A*, *EZH2*, *PRDM1*, *PTEN*, *RMRP*, and *TP63* for approximately half of the *MYC* study cohort. The analysis was performed by Polymorphic DNA Technologies Inc. CA. The variants discovered were subgrouped into either germline single nucleotide polymorphism (SNP) according to the dbSNP database (Build 132) or putative somatic mutations. Sequencing analyses on matched corresponding normal tissue were also performed in 92 patients for comparison and validation. The data analysis was performed using the Agent Software from Paracel, Inc., a division of Applera Corp.

### **Functional Prediction of Myc Mutants**

Functional effect prediction of missense and nonsense Myc mutations were computed by 10 models, including PhyloP, LRT, PolyPhen2 (including PolyPhen2\_HVAR and PolyPhen2\_HDIV), FATHMM, SiPhy, MutationTaster, MutationAssessor, SIFT, GERP++. Mutations were considered to affect Myc function only if at least four of these algorithms predicted that they were not neutral.

### **Assessment of *MYC* Rearrangements and Myc Expression**

*MYC* rearrangements were detected by fluorescence *in situ* hybridization using two probes (a locus-specific identifier *IGH/MYC/CEP8* tri-color dual-fusion probe and a locus-specific identifier *MYC* dual-color, break-apart probe).

Tumor cell-rich areas from the diagnostic formalin-fixed, paraffin-embedded tissue blocks were selected to prepare the tissue microarrays using a tissue microarrayer (Beecher Instruments). Immunohistochemistry for Myc using a monoclonal anti-(c)MYC antibody, clone Y69 (Epitomics, Burlingame, CA, USA) and other biomarkers with respective antibodies were performed on the tissue microarray sections undergoing deparaffinization, heat induced antigen retrieval techniques and primary antibody incubation. Details of technics and scoring processes have been described previously.<sup>1, 2, 3</sup>

### **Functional Studies of Myc Mutants *in vitro* and *in vivo***

To exam the effect of Myc mutants, we constructed stable cell lines using Rat1A as a parent line. A wild-type human Myc plasmid was purchased from Addgene (pBabe-c-myc-zeo, Plasmid #17758; Cambridge, MA), and different mutants were constructed using PCR-based

mutagenesis and validated by DNA sequencing. To obtain stable lines, Rat1A cells were transduced with viral particles with *MYC* constructs or the control vector (pBabe-zeo). Forty-eight hours after transduction, cells were selected using 200 µg/ml of Zeocin (ThermoFisher, Waltham, MA) for 2 weeks. For proliferation assay,  $5 \times 10^4$  cells were seeded in 6-well plates and cell numbers were counted 4 days later. For apoptosis assay, cells were incubated in medium without serum for 48 h and apoptosis was determined by flow cytometry with Annexin-V FITC/PI. For protein expression analysis, lysates of  $5 \times 10^6$  cells were used for a Western blotting analysis.<sup>4</sup> For colon formation, 3,000 cells were plated on 60mm soft agar plates and allowed to grow for 2 weeks. For *in vivo* tumorigenesis,  $5 \times 10^6$  cells were injected subcutaneously into 8-week old outbred athymic *Foxn1<sup>nu</sup>/Foxn1<sup>nu</sup>* male mice (The Jackson Laboratory, Bar Harbor, ME).

#### References:

1. Tzankov A, Xu-Monette ZY, Gerhard M, Visco C, Dirnhofer S, Gisin N, *et al.* Rearrangements of MYC gene facilitate risk stratification in diffuse large B-cell lymphoma patients treated with rituximab-CHOP. *Mod Pathol* 2014, **27**: 958-971.
2. Visco C, Tzankov A, Xu-Monette ZY, Miranda RN, Tai YC, Li Y, *et al.* Patients with diffuse large B-cell lymphoma of germinal center origin with BCL2 translocations have poor outcome, irrespective of MYC status: a report from an International DLBCL rituximab-CHOP Consortium Program Study. *Haematologica* 2013, **98**: 255-263.
3. Hu S, Xu-Monette ZY, Tzankov A, Green T, Wu L, Balasubramanyam A, *et al.* MYC/BCL2 protein coexpression contributes to the inferior survival of activated B-cell subtype of diffuse large B-cell lymphoma and demonstrates high-risk gene expression signatures: a report from The International DLBCL Rituximab-CHOP Consortium Program. *Blood* 2013, **121**: 4021-4031; quiz 4250.
4. Takwi A, Li Y, Buscaglia L, *et al.* A Statin-regulated MicroRNA Represses Human c-Myc Expression and Function. *EMBO Mol Med.* 2012;4(9):896-909.

**Supplementary Table S1.** Numbers of *MYC* mutation present in the sequenced 750 patients with diffuse large B-cell lymphoma (DLBCL) and numbers of AGCT sequence motif (a preferred site by activation-induced cytidine deaminase) in the 5′ or 3′ untranslated regions (UTRs) and the coding sequence (CDS) of *MYC*

|                                     | <b>5′UTR</b> | <b>CDS</b> | <b>3′UTR</b> |
|-------------------------------------|--------------|------------|--------------|
| <b>Mutation numbers</b>             | 173          | 254        | 35           |
| <b>DNA length, bp</b>               | 569          | 1317       | 479          |
| <b>Mutation rate (per 1000 bp)*</b> | 0.405        | 0.257      | 0.097        |
| <b>AGCT motif numbers</b>           | 3            | 14         | 0            |

**Note:** \* The mutation rates are the mean number of mutations per 1000 bp over the whole cohort.

**Supplementary Table S2.** Clinical and molecular characteristics of the 368 patients with diffuse large B-cell lymphoma (DLBCL) in the training set harboring wild-type (WT) or mutated (MUT) Myc, or N11S single nucleotide polymorphism in the coding sequence of *MYC*

| Variables                      | DLBCL            |                 |             | GCB-DLBCL        |                 |              | ABC-DLBCL        |                 |      | DLBCL               |                     |             |
|--------------------------------|------------------|-----------------|-------------|------------------|-----------------|--------------|------------------|-----------------|------|---------------------|---------------------|-------------|
|                                | MUT-Myc<br>N (%) | WT-Myc<br>N (%) |             | MUT-Myc<br>N (%) | WT-Myc<br>N (%) |              | MUT-Myc<br>N (%) | WT-Myc<br>N (%) |      | WT-Myc-I1S<br>N (%) | WT-Myc-I1N<br>N (%) |             |
| <b>Age</b>                     |                  |                 |             |                  |                 |              |                  |                 |      |                     |                     |             |
| < 60 y                         | 27 (52.9)        | 129 (40.7)      | 0.13        | 17 (56.7)        | 74 (46.5)       | 0.33         | 10 (47.6)        | 54 (34.6)       | 0.33 | 10 (50)             | 119 (40.1)          | 0.48        |
| ≥ 60 y                         | 24 (47.1)        | 188 (59.3)      |             | 13 (43.3)        | 85 (53.5)       |              | 11 (52.4)        | 102 (65.4)      |      | 10 (50)             | 178 (59.9)          |             |
| <b>Sex</b>                     |                  |                 |             |                  |                 |              |                  |                 |      |                     |                     |             |
| Female                         | 18 (35.3)        | 137 (43.2)      | 0.29        | 11 (36.7)        | 73 (45.9)       | 0.35         | 7 (33.3)         | 63 (40.4)       | 0.54 | 8 (40)              | 129 (43.4)          | 0.76        |
| Male                           | 33 (64.7)        | 180 (56.8)      |             | 19 (63.3)        | 86 (54.1)       |              | 14 (66.7)        | 93 (59.6)       |      | 12 (60)             | 168 (56.6)          |             |
| <b>Stage</b>                   |                  |                 |             |                  |                 |              |                  |                 |      |                     |                     |             |
| I - II                         | 21 (41.2)        | 135 (44.4)      | 0.67        | 15 (50.0)        | 77 (50.3)       | 0.97         | 6 (28.6)         | 57 (38.3)       | 0.39 | 10 (55.6)           | 125 (43.7)          | 0.33        |
| III - IV                       | 30 (58.8)        | 169 (55.6)      |             | 15 (50.0)        | 76 (49.7)       |              | 15 (71.4)        | 92 (61.7)       |      | 8 (44.4)            | 161 (56.3)          |             |
| <b>B-symptoms</b>              |                  |                 |             |                  |                 |              |                  |                 |      |                     |                     |             |
| No                             | 31 (63.3)        | 193 (64.8)      | 0.84        | 18 (64.3)        | 106 (71.6)      | 0.44         | 13 (61.9)        | 85 (57.4)       | 0.70 | 12 (63.2)           | 181 (64.9)          | 0.88        |
| Yes                            | 18 (36.7)        | 105 (35.2)      |             | 10 (35.7)        | 42 (28.4)       |              | 8 (38.1)         | 63 (42.6)       |      | 7 (36.8)            | 98 (35.1)           |             |
| <b>LDH level</b>               |                  |                 |             |                  |                 |              |                  |                 |      |                     |                     |             |
| Normal                         | 20 (41.7)        | 117 (40.9)      | 0.92        | 13 (46.4)        | 62 (43.7)       | 0.79         | 7 (35.0)         | 54 (38.0)       | 0.79 | 10 (52.6)           | 107 (40.1)          | 0.28        |
| Elevated                       | 28 (58.3)        | 169 (59.1)      |             | 15 (53.6)        | 80 (56.3)       |              | 13 (65.0)        | 88 (62.0)       |      | 9 (47.4)            | 160 (59.9)          |             |
| <b>No. of extranodal sites</b> |                  |                 |             |                  |                 |              |                  |                 |      |                     |                     |             |
| 0 - 1                          | 38 (76.0)        | 227 (75.9)      | 0.99        | 22 (75.9)        | 117 (79.1)      | 0.70         | 16 (76.2)        | 108 (72.5)      | 0.72 | 13 (76.5)           | 214 (75.9)          | 0.96        |
| ≥ 2                            | 12 (24.0)        | 72 (24.1)       |             | 7 (24.1)         | 31 (20.9)       |              | 5 (23.8)         | 41 (27.5)       |      | 4 (23.5)            | 68 (24.1)           |             |
| <b>ECOG performance status</b> |                  |                 |             |                  |                 |              |                  |                 |      |                     |                     |             |
| 0 - 1                          | 39 (83.0)        | 230 (82.1)      | 0.89        | 21 (77.8)        | 118 (87.4)      | 0.19         | 18 (90.0)        | 110 (76.9)      | 0.18 | 14 (82.4)           | 216 (82.1)          | 0.97        |
| ≥ 2                            | 8 (17.0)         | 50 (17.9)       |             | 6 (22.2)         | 17 (12.6)       |              | 2 (10.0)         | 33 (23.1)       |      | 3 (17.6)            | 47 (17.9)           |             |
| <b>Size of largest tumor</b>   |                  |                 |             |                  |                 |              |                  |                 |      |                     |                     |             |
| < 5cm                          | 21 (60.0)        | 146 (59.8)      | 0.98        | 10 (47.6)        | 76 (60.3)       | 0.27         | 11 (78.6)        | 69 (59.0)       | 0.15 | 11 (84.6)           | 135 (58.4)          | <b>0.06</b> |
| ≥ 5cm                          | 14 (40.0)        | 98 (40.2)       |             | 11 (52.4)        | 50 (39.7)       |              | 3 (21.4)         | 48 (41.0)       |      | 2 (15.4)            | 96 (41.6)           |             |
| <b>IPI score</b>               |                  |                 |             |                  |                 |              |                  |                 |      |                     |                     |             |
| 0 - 2                          | 32 (64.0)        | 184 (60.5)      | 0.64        | 18 (62.1)        | 102 (67.1)      | 0.60         | 14 (66.7)        | 80 (53.3)       | 0.25 | 15 (78.9)           | 169 (59.3)          | <b>0.09</b> |
| 3 - 5                          | 18 (36.0)        | 120 (39.5)      |             | 11 (37.9)        | 50 (32.9)       |              | 7 (33.3)         | 70 (46.7)       |      | 4 (21.1)            | 116 (40.7)          |             |
| <b>Therapy response</b>        |                  |                 |             |                  |                 |              |                  |                 |      |                     |                     |             |
| CR                             | 36 (70.6)        | 235 (74.1)      | 0.59        | 21 (70.0)        | 118 (74.2)      | 0.63         | 15 (71.4)        | 115 (73.7)      | 0.82 | 17 (85.0)           | 218 (73.4)          | 0.25        |
| PR                             | 6                | 47              |             | 4                | 21              |              | 2                | 26              |      | 2                   | 45                  |             |
| SD                             | 0                | 16              |             | 0                | 8               |              | 0                | 8               |      | 0                   | 16                  |             |
| PD                             | 9                | 19              |             | 5                | 12              |              | 4                | 7               |      | 1                   | 18                  |             |
| <b>Primary origin</b>          |                  |                 |             |                  |                 |              |                  |                 |      |                     |                     |             |
| Nodal                          | 39 (76.5)        | 193 (62.5)      | <b>0.05</b> | 25 (83.3)        | 92 (59.4)       | <b>0.013</b> | 14 (66.7)        | 99 (65.1)       | 0.89 | 12 (60)             | 181 (62.6)          | .81         |
| Extranodal                     | 12 (23.5)        | 116 (37.5)      |             | 5 (16.7)         | 63 (40.6)       |              | 7 (33.3)         | 53 (34.9)       |      | 8 (40)              | 108 (37.4)          |             |

|                             |           |            |                   |           |            |                   |           |            |              |           |            |              |
|-----------------------------|-----------|------------|-------------------|-----------|------------|-------------------|-----------|------------|--------------|-----------|------------|--------------|
| <b>Cell-of-origin</b>       |           |            |                   |           |            |                   |           |            |              |           |            |              |
| GCB                         | 30 (58.8) | 159 (50.5) | 0.29              | 30 (100)  | 159 (100)  |                   | 0 (0)     | 0 (0)      |              | 10 (50)   | 149 (50.5) | 1.00         |
| ABC                         | 21 (41.2) | 156 (49.5) |                   | 0 (0)     | 0 (0)      |                   | 21 (100)  | 156 (100)  |              | 10 (50)   | 146 (49.5) |              |
| <b>Ki-67 index</b>          |           |            |                   |           |            |                   |           |            |              |           |            |              |
| < 70%                       | 17 (33.3) | 104 (33.7) | 1.00              | 10 (33.3) | 58 (37.7)  | 0.69              | 7 (33.3)  | 46 (29.7)  | 0.80         | 7 (35)    | 97 (33.6)  | 1.00         |
| ≥ 70%                       | 34 (66.7) | 205 (66.3) |                   | 20 (66.7) | 96 (62.3)  |                   | 14 (66.7) | 109 (70.3) |              | 13 (65)   | 192 (66.4) |              |
| <b>TP53 mutations</b>       |           |            |                   |           |            |                   |           |            |              |           |            |              |
| No                          | 38 (76.0) | 237 (78.5) | 0.69              | 22 (75.9) | 113 (73.4) | 1.00              | 16 (76.2) | 122 (83.6) | 0.37         | 16 (94.1) | 221 (78)   | 0.13         |
| Yes                         | 12 (24.0) | 65 (21.5)  |                   | 7 (24.1)  | 41 (26.6)  |                   | 5 (23.8)  | 24 (16.4)  |              | 1 (5.9)   | 64 (22)    |              |
| <b>MYC translocation</b>    |           |            |                   |           |            |                   |           |            |              |           |            |              |
| No                          | 24 (72.7) | 206 (90)   | <b>0.0094</b>     | 12 (63.2) | 98 (88.3)  | <b>0.011</b>      | 12 (85.7) | 108 (91.5) | 0.62         | 13 (100)  | 193 (89.4) | 0.37         |
| Yes                         | 9 (27.3)  | 23 (10)    |                   | 7 (36.8)  | 13 (11.7)  |                   | 2 (14.3)  | 10 (8.5)   |              | 0 (0)     | 23 (10.6)  |              |
| <b>BCL2 translocation</b>   |           |            |                   |           |            |                   |           |            |              |           |            |              |
| No                          | 33 (73.3) | 222 (82.5) | 0.15              | 16 (61.5) | 90 (68.2)  | 0.50              | 17 (89.5) | 132 (96.4) | 0.20         | 12 (80)   | 210 (82.7) | 0.73         |
| Yes                         | 12 (26.7) | 47 (17.5)  |                   | 10 (38.5) | 42 (31.8)  |                   | 2 (10.5)  | 5 (3.6)    |              | 3 (20)    | 44 (17.3)  |              |
| <b>BCL6 translocation</b>   |           |            |                   |           |            |                   |           |            |              |           |            |              |
| No                          | 24 (60.0) | 165 (69.9) | 0.21              | 19 (79.2) | 91 (76.5)  | 0.77              | 5 (31.3)  | 74 (63.2)  | <b>0.015</b> | 10 (76.9) | 155 (69.5) | 0.57         |
| Yes                         | 16 (40)   | 71 (30.1)  |                   | 5 (20.8)  | 28 (23.5)  |                   | 11 (68.8) | 43 (36.8)  |              | 3 (23.1)  | 68 (30.5)  |              |
| <b>MYC 5'UTR mutations</b>  |           |            |                   |           |            |                   |           |            |              |           |            |              |
| Mutations                   | 22 (41.5) | 47 (14.9)  | <b>&lt;0.0001</b> | 15 (50)   | 26 (16.4)  | <b>&lt;0.0001</b> | 7 (33.3)  | 21 (13.5)  | <b>0.028</b> | 2 (10)    | 44 (15)    | 0.54         |
| WT                          | 30 (58.5) | 270 (85.1) |                   | 15 (50)   | 133 (83.6) |                   | 14 (66.7) | 135 (86.5) |              | 18 (90)   | 251 (85)   |              |
| <b>MYC 3'UTR mutations</b>  |           |            |                   |           |            |                   |           |            |              |           |            |              |
| Mutations                   | 4 (7.7)   | 16 (5.1)   | 0.50              | 2 (6.7)   | 9 (5.7)    | 0.83              | 2 (9.5)   | 7 (4.5)    | 0.32         | 1 (5)     | 15 (5.1)   | 1.00         |
| WT                          | 47 (92.3) | 301 (94.9) |                   | 28 (93.3) | 150 (94.3) |                   | 19 (90.5) | 149 (95.5) |              | 19 (95)   | 280 (94.9) |              |
| <b>p53 expression</b>       |           |            |                   |           |            |                   |           |            |              |           |            |              |
| < 20%                       | 31 (62.0) | 181(62.2)  | 1.00              | 18 (62.1) | 92 (62.2)  | 1.00              | 13 (61.9) | 89 (62.2)  | 1.00         | 13 (81.3) | 166 (61)   | 0.12         |
| ≥ 20%                       | 19 (38.0) | 110 (37.8) |                   | 11 (37.9) | 56 (37.8)  |                   | 8 (38.1)  | 54 (37.8)  |              | 3 (18.8)  | 106 (39)   |              |
| <b>MDM2 expression</b>      |           |            |                   |           |            |                   |           |            |              |           |            |              |
| < 20%                       | 30 (58.8) | 174 (56.7) | 0.77              | 20 (66.7) | 92 (59.7)  | 0.48              | 10 (47.6) | 82 (53.6)  | 0.61         | 15 (78.9) | 159 (54.5) | <b>0.043</b> |
| ≥ 20%                       | 21 (41.2) | 133 (43.5) |                   | 10 (33.3) | 62 (40.3)  |                   | 11 (52.4) | 71 (46.4)  |              | 4 (21.1)  | 129 (45.5) |              |
| <b>p21 expression</b>       |           |            |                   |           |            |                   |           |            |              |           |            |              |
| Negative                    | 33 (66.0) | 209 (71.8) | 0.40              | 21 (72.4) | 116 (78.4) | 0.47              | 12 (57.1) | 93 (65.0)  | 0.48         | 11 (68.8) | 198 (72.0) | 0.78         |
| Positive                    | 17 (34.0) | 82 (28.2)  |                   | 8 (27.6)  | 32 (21.6)  |                   | 9 (42.9)  | 50 (35.0)  |              | 5 (31.3)  | 77 (28.0)  |              |
| <b>p16 expression</b>       |           |            |                   |           |            |                   |           |            |              |           |            |              |
| ≤ 10%                       | 28 (75.7) | 157 (62.5) | 0.14              | 16 (72.7) | 67 (52.8)  | 0.10              | 12 (80.0) | 89 (72.4)  | 0.76         | 13 (76.5) | 144 (61.5) | 0.30         |
| > 10%                       | 9 (24.3)  | 94 (37.5)  |                   | 6 (27.3)  | 60 (47.2)  |                   | 3 (20.0)  | 34 (27.6)  |              | 4 (23.5)  | 90 (38.5)  |              |
| <b>Myc expression</b>       |           |            |                   |           |            |                   |           |            |              |           |            |              |
| < 40%                       | 10 (20.8) | 93 (31.6)  | 0.17              | 6 (21.4)  | 55 (38.5)  | 0.13              | 4 (20.0)  | 37 (24.8)  | 0.79         | 12 (60.0) | 81 (29.6)  | <b>0.01</b>  |
| ≥ 40%                       | 38 (79.2) | 201 (68.4) |                   | 22 (78.6) | 88( 61.5)  |                   | 16 (80.0) | 112 (75.2) |              | 8 (40)    | 193 (70.4) |              |
| <b>Bcl-2 overexpression</b> |           |            |                   |           |            |                   |           |            |              |           |            |              |
| < 70%                       | 32 (62.7) | 157 (51.0) | 0.13              | 21 (70.0) | 95 (61.3)  | 0.41              | 11 (52.4) | 62 (40.5)  | 0.35         | 12 (60)   | 145 (50.3) | 0.49         |
| ≥ 70%                       | 19 (37.3) | 151 (49.0) |                   | 9 (30.0)  | 60 (38.7)  |                   | 10 (47.6) | 91 (59.5)  |              | 8 (40)    | 143 (49.7) |              |
| <b>Bcl-6 expression</b>     |           |            |                   |           |            |                   |           |            |              |           |            |              |
| ≤ 30%                       | 8 (16.0)  | 70 (22.7)  | 0.36              | 1 (3.3)   | 19 (12.3)  | 0.21              | 10 (50.0) | 73 (47.4)  | 1.00         | 5 (26.3)  | 65 (22.5)  | 0.78         |

|                                |           |            |        |           |            |        |           |            |       |           |            |      |
|--------------------------------|-----------|------------|--------|-----------|------------|--------|-----------|------------|-------|-----------|------------|------|
| > 30%                          | 42 (84.0) | 238 (77.3) |        | 29 (96.7) | 135 (87.7) |        | 10 (50.0) | 81 (52.6)  |       | 14 (73.7) | 224 (77.5) |      |
| <b>GCET1 expression</b>        |           |            |        |           |            |        |           |            |       |           |            |      |
| < 50%                          | 32 (64.0) | 206 (66.9) | 0.75   | 15 (50.0) | 69 (44.8)  | 0.69   | 17 (85.0) | 137 (89.0) | 0.71  | 10 (55.6) | 196 (67.6) | 0.31 |
| ≥ 50%                          | 18 (36.0) | 102 (33.1) |        | 15 (50.0) | 85 (55.2)  |        | 3 (15.0)  | 17 (11.0)  |       | 8 (44.4)  | 94 (32.4)  |      |
| <b>CD5 expression</b>          |           |            |        |           |            |        |           |            |       |           |            |      |
| Negative                       | 51 (100)  | 286 (92.6) | 0.77   | 30 (100)  | 148 (97.4) | 1.00   | 21 (100)  | 138 (88.5) | 0.91  | 16 (80)   | 270 (93.4) | 0.05 |
| Positive                       | 0 (0)     | 23 (7.4)   |        | 0 (0)     | 4 (2.6)    |        | 0 (0)     | 18 (11.5)  |       | 4 (20)    | 19 (6.6)   |      |
| <b>CD10 expression</b>         |           |            |        |           |            |        |           |            |       |           |            |      |
| < 40%                          | 22 (43.1) | 201 (64.2) | 0.0052 | 4 (13.3)  | 53 (33.8)  | 0.03   | 18 (85.7) | 148 (94.9) | 0.13  | 11 (57.9) | 190 (64.6) | 0.62 |
| ≥ 40%                          | 29 (56.9) | 112 (35.8) |        | 26 (86.7) | 104 (66.2) |        | 3 (14.3)  | 8 (5.1)    |       | 8 (42.1)  | 104 (35.4) |      |
| <b>FOXP1 expression</b>        |           |            |        |           |            |        |           |            |       |           |            |      |
| < 60%                          | 18 (36.0) | 124 (39.9) | 0.64   | 13 (44.8) | 100 (64.5) | 0.06   | 5 (23.8)  | 24 (15.4)  | 0.35  | 8 (44.4)  | 116 (39.6) | 0.80 |
| ≥ 60%                          | 32 (64.0) | 187 (60.1) |        | 16 (55.2) | 55 (35.5)  |        | 16 (76.2) | 132 (84.6) |       | 10 (55.6) | 177 (60.4) |      |
| <b>MUM1 expression</b>         |           |            |        |           |            |        |           |            |       |           |            |      |
| < 30%                          | 28 (54.9) | 151 (48.7) | 0.45   | 20 (66.7) | 119 (76.8) | 0.25   | 8 (38.1)  | 32 (20.6)  | 0.095 | 10 (50)   | 141 (48.6) | 1.00 |
| ≥ 30%                          | 23 (45.1) | 159 (51.3) |        | 10 (33.3) | 36 (23.2)  |        | 13 (61.9) | 123 (79.4) |       | 10 (50)   | 149 (51.4) |      |
| <b>CD30 expression</b>         |           |            |        |           |            |        |           |            |       |           |            |      |
| Negative                       | 47 (92.2) | 258 (82.7) | 0.10   | 29 (96.7) | 128 (82.1) | 0.052  | 18 (85.7) | 129 (83.2) | 1.00  | 16 (80)   | 242 (82.9) | 0.76 |
| Positive                       | 4 (7.8)   | 54 (17.3)  |        | 1 (3.3)   | 28 (17.9)  |        | 3 (14.3)  | 26 (16.8)  |       | 4 (20)    | 50 (17.1)  |      |
| <b>PI3K overexpression</b>     |           |            |        |           |            |        |           |            |       |           |            |      |
| < 70%                          | 24 (55.8) | 204 (72.1) | 0.048  | 14 (56.0) | 104 (75.4) | 0.055  | 10 (55.6) | 100 (69.4) | 0.29  | 17 (89.5) | 187 (70.8) | 0.11 |
| ≥ 70%                          | 19 (44.2) | 79 (27.9)  |        | 11 (44.0) | 34 (24.6)  |        | 8 (44.4)  | 44 (30.6)  |       | 2 (10.5)  | 77 (29.2)  |      |
| <b>pSTAT3 overexpression</b>   |           |            |        |           |            |        |           |            |       |           |            |      |
| < 50%                          | 38 (88.4) | 214 (81.4) | 0.39   | 23 (95.8) | 109 (85.2) | 0.20   | 15 (78.9) | 105 (77.8) | 1.00  | 13 (76.5) | 201 (81.7) | 0.53 |
| ≥ 50%                          | 5 (11.6)  | 49 (18.6)  |        | 1 (4.2)   | 19 (14.8)  |        | 4 (21.1)  | 30 (22.2)  |       | 4 (23.5)  | 45 (18.3)  |      |
| <b>pAKT overexpression</b>     |           |            |        |           |            |        |           |            |       |           |            |      |
| ≤ 60%                          | 39 (83.0) | 244 (80.5) | 0.84   | 20 (74.1) | 121 (79.6) | 0.61   | 19 (95.0) | 122 (87.3) | 0.23  | 16 (80)   | 228 (80.7) | 1.00 |
| > 60%                          | 8 (17.0)  | 59 (19.5)  |        | 7 (25.9)  | 31 (20.4)  |        | 1 (5.0)   | 28 (18.7)  |       | 4 (20)    | 55 (19.3)  |      |
| <b>p63 expression</b>          |           |            |        |           |            |        |           |            |       |           |            |      |
| < 10%                          | 20 (43.5) | 177 (58.4) | 0.078  | 14 (51.9) | 90 (60.4)  | 0.41   | 6 (31.6)  | 86 (56.2)  | 0.052 | 11 (57.9) | 166 (58.5) | 1.00 |
| ≥ 10%                          | 26 (56.5) | 126 (41.6) |        | 13 (48.1) | 59 (39.6)  |        | 13 (68.4) | 67 (43.8)  |       | 8 (42.1)  | 118 (41.5) |      |
| <b>BLIMP-1 expression</b>      |           |            |        |           |            |        |           |            |       |           |            |      |
| < 10%                          | 34 (69.4) | 217 (72.8) | 0.61   | 24 (82.8) | 129 (86.6) | 0.56   | 10 (50.0) | 88 (59.1)  | 0.48  | 15 (75)   | 202 (72.7) | 1.00 |
| ≥ 10%                          | 15 (30.6) | 81 (27.2)  |        | 5 (17.2)  | 20 (13.4)  |        | 10 (50.0) | 61 (40.9)  |       | 5 (25)    | 76 (27.3)  |      |
| <b>Nuclear p50 expression</b>  |           |            |        |           |            |        |           |            |       |           |            |      |
| Negative                       | 21 (47.7) | 134 (48.6) | 1.00   | 16 (61.5) | 82 (60.3)  | 1.00   | 5 (27.8)  | 52 (37.1)  | 0.60  | 8 (44.4)  | 126 (48.4) | 1.00 |
| Positive                       | 23 (52.3) | 142 (51.4) |        | 10 (38.5) | 54 (39.7)  |        | 13 (72.2) | 88 (62.9)  |       | 10 (55.6) | 132 (51.6) |      |
| <b>Nuclear p52 expression</b>  |           |            |        |           |            |        |           |            |       |           |            |      |
| Negative                       | 41 (89.1) | 200 (69.2) | 0.0044 | 24 (92.3) | 97 (67.8)  | 0.0092 | 17 (85.0) | 102 (70.3) | 0.20  | 13 (72.2) | 187 (69.0) | 1.00 |
| Positive                       | 5 (10.9)  | 89 (30.8)  |        | 2 (7.7)   | 46 (32.3)  |        | 3 (15.0)  | 43 (29.7)  |       | 5 (27.8)  | 84 (31.0)  |      |
| <b>Nuclear p65 expression</b>  |           |            |        |           |            |        |           |            |       |           |            |      |
| Negative                       | 19 (42.2) | 117 (40.9) | 0.87   | 12 (46.2) | 49 (35.3)  | 0.38   | 7 (36.8)  | 67 (46.2)  | 0.47  | 6 (35.3)  | 111 (41.3) | 0.80 |
| Positive                       | 26 (57.8) | 169 (59.1) |        | 14 (53.8) | 90 (64.7)  |        | 12 (63.2) | 78 (53.8)  |       | 11 (64.7) | 158 (58.7) |      |
| <b>Nuclear RelB expression</b> |           |            |        |           |            |        |           |            |       |           |            |      |



|                                 |           |            |      |           |            |      |           |           |      |           |            |      |
|---------------------------------|-----------|------------|------|-----------|------------|------|-----------|-----------|------|-----------|------------|------|
| Negative                        | 39 (86.7) | 243 (87.4) | 0.81 | 22 (84.6) | 123 (88.5) | 0.53 | 14 (77.8) | 94 (67.1) | 0.43 | 17 (94.4) | 226 (86.9) | 0.71 |
| Positive                        | 6 (13.3)  | 35 (12.6)  |      | 4 (15.4)  | 16 (11.5)  |      | 4 (22.2)  | 46 (32.9) |      | 1 (5.6)   | 34 (13.1)  |      |
| <b>Nuclear c-Rel expression</b> |           |            |      |           |            |      |           |           |      |           |            |      |
| Negative                        | 35 (79.5) | 181 (66.8) | 0.11 | 21 (80.8) | 87 (66.4)  | 0.17 | 14 (77.8) | 94 (67.1) | 0.43 | 9 (52.9)  | 172 (67.7) | 0.29 |
| Positive                        | 9 (20.5)  | 90 (33.2)  |      | 5 (19.2)  | 44 (33.6)  |      | 4 (22.2)  | 46 (32.9) |      | 8 (47.1)  | 82 (32.3)  |      |
| <b>CXCR4 expression</b>         |           |            |      |           |            |      |           |           |      |           |            |      |
| < 20%                           | 34 (73.9) | 197 (70.1) | 0.73 | 20 (76.9) | 108 (77.1) | 1.00 | 14 (70.0) | 88 (62.9) | 0.62 | 14 (82.4) | 183 (69.3) | 0.41 |
| ≥ 20%                           | 12 (26.1) | 84 (29.9)  |      | 6 (23.1)  | 32 (22.9)  |      | 6 (30.0)  | 52 (37.1) |      | 3 (17.6)  | 81 (30.7)  |      |

**Abbreviations:** GCB, germinal-center B-cell–like; ABC, activated B–cell like; LDH, lactate dehydrogenase; ECOG, Eastern Cooperative Oncology Group; IPI, International Prognostic Index; CR, complete remission; PR, partial response; SD, stable disease; PD, progressive disease. For therapy response, we calculated *P* values as CR vs. other responses. Some clinicopathologic data for some cases were not available due to various reasons such as laboratory failure or tissue exhaustion.

**Supplementary Table S3.** Lists of Myc mutations found in the training and validation sets and corresponding patient survival

**(A) Training Set**

| Accession # | Myc <sup>high</sup> | Myc mutations | AA changes                            | OS     | Status | PFS    | Status |
|-------------|---------------------|---------------|---------------------------------------|--------|--------|--------|--------|
| N0004       | 0                   | MUT           | 151S>F; 168H>R                        | 111.72 | 0      | 111.72 | 0      |
| N0005       | 0                   | MUT           | 75V>I                                 | 83.05  | 0      | 83.05  | 0      |
| N0009       | 0                   | MUT           | 119P>S                                | 94.85  | 0      | 94.85  | 0      |
| N0012       | 0                   | MUT           | 84G>E;288S>N;290P>S                   | 7.66   | 1      | 7.66   | 1      |
| N0031       | 1                   | MUT           | 58T>A; 138F>S; 154A>P; 175S>R; 178L>M | 12.43  | 1      | 12.43  | 1      |
| N0070       | 0                   | MUT           | 58T>A                                 | 1.28   | 1      | 1.28   | 1      |
| N0081       | 0                   | MUT           | 185A>V                                | 48.07  | 0      | 48.07  | 0      |
| N0089       | 1                   | MUT           | 202S>N                                | 72.59  | 0      | 72.59  | 0      |
| N0111       | 0                   | MUT           | 401A>T                                | 13.02  | 1      | 13.02  | 1      |
| N0114       | 0                   | MUT           | 265V>A; 216F>L                        | 24.2   | 1      | 24.2   | 1      |
| N0121       | 0                   | MUT           | 5V>I; 299R>K                          | 20.25  | 1      | 20.25  | 1      |
| N0124       | 0                   | MUT           | splicing                              | 103.96 | 0      | 103.96 | 0      |
| N0125       | 0                   | MUT           | 174S>F                                | 103.2  | 0      | 103.2  | 0      |
| N0137       | 0                   | MUT           | 79P>L; 432E>G                         | 71.01  | 1      | 71.01  | 1      |
| N0142       | 0                   | MUT           | 83R>L                                 | 100.14 | 0      | 100.14 | 0      |
| N0165       | 0                   | MUT           | 186S>L                                | 186.71 | 0      | 78.71  | 1      |
| N0183       | 0                   | MUT           | 421R>Q                                | 14.24  | 1      | 4.31   | 1      |
| N0186       | 0                   | MUT           | 164P>S; 202S>N                        | 74.47  | 0      | 74.47  | 0      |
| N0193       | 1                   | MUT           | 405S>F                                | 71.05  | 0      | 71.05  | 0      |
| N0194       | 0                   | MUT           | 356R>K                                | 2.17   | 1      | 2.17   | 1      |
| N0211       | 0                   | MUT           | 237P>L                                | 36.03  | 0      | 36.03  | 0      |
| N0214       | .                   | MUT           | 141A>T                                | 75.39  | 0      | 75.39  | 0      |
| N0226       | 0                   | MUT           | 321A>T                                | 59.97  | 0      | 59.97  | 0      |
| N0228       | 1                   | MUT           | 355K>R; 386N>S                        | 75.75  | 0      | 75.75  | 0      |
| N0230       | 1                   | MUT           | 364R>H; 421R>W                        | 74.76  | 0      | 74.76  | 0      |
| N0240       | 1                   | MUT           | 357R>Q;150A>V                         | 15.19  | 1      | 6.54   | 1      |
| N0246       | 0                   | MUT           | 63P>L                                 | 88.87  | 0      | 88.87  | 0      |
| -           | 0                   | MUT           | 135W>X; 239V>M                        | 15.35  | 0      | 15.35  | 0      |
| N0311       | 0                   | MUT           | 39E>K; 250S>N                         | 7.59   | 1      | 7.59   | 1      |
| N0317       | 0                   | MUT           | 173T>I; 213S>F                        | 61.94  | 0      | 61.94  | 0      |
| N0320       | 0                   | MUT           | 106L>P                                | 3.55   | 0      | 3.55   | 0      |
| N0324       | 1                   | MUT           | 141A>T; 243E>K; 282P>L                | 18.18  | 0      | 18.18  | 0      |
| N0343       | 1                   | MUT           | 240L>F; 302V>I                        | 76.11  | 1      | 41.49  | 1      |
| N0380       | 1                   | MUT           | 11N>S; 376A>T                         | 2.79   | 1      | 2.79   | 1      |
| N0397       | 1                   | MUT           | 135W>X; 413L>P                        | 103.2  | 0      | 103.2  | 0      |

|       |   |     |                                     |        |   |        |   |
|-------|---|-----|-------------------------------------|--------|---|--------|---|
| N0405 | 0 | MUT | 379D>N; 429H>R                      | 75.91  | 0 | 75.91  | 0 |
| N0407 | 0 | MUT | 185A>T                              | 75.88  | 0 | 75.88  | 1 |
| N0421 | 0 | MUT | 256Q>X                              | 18.97  | 0 | 18.97  | 1 |
| N0439 | 0 | MUT | 10R>K                               | 38.14  | 0 | 38.14  | 0 |
| N0456 | 1 | MUT | 62S>P                               | 44.75  | 0 | 44.75  | 1 |
| N0486 | 0 | MUT | 197Y>H; 44A>T; 62S>P                | 82.88  | 0 | 82.88  | 0 |
| N0518 | 1 | MUT | 111V>M; 39E>D;                      | 20.91  | 0 | 20.91  | 0 |
| N0538 | 0 | MUT | 383E>K                              | 74.5   | 0 | 74.5   | 0 |
| N0539 | 1 | MUT | 150A>T                              | 73.78  | 0 | 73.78  | 0 |
| N0571 | 0 | MUT | 435R>W                              | 25.35  | 1 | 25.35  | 1 |
| N0578 | 0 | MUT | 132D>N                              | 85.48  | 0 | 85.48  | 0 |
| N0595 | 0 | MUT | 153Q>X; 324R>K; 330V>I              | 62.83  | 0 | 62.83  | 0 |
| N0597 | 0 | MUT | 392K>E; 11N>S                       | 53.95  | 0 | 53.95  | 1 |
| N0600 | 1 | MUT | 58T>N; 138F>C                       | 5.85   | 1 | 4.87   | 1 |
| N0612 | 1 | MUT | 77V>I; 85D>N; 154A>T                | 10.82  | 1 | 10.65  | 1 |
| N0616 | 0 | MUT | insertion at 60 <sup>th</sup> codon | 124.04 | 0 | 124.04 | 0 |
| N0015 | 0 | SNP | 11N>S                               | 58.78  | 0 | 58.78  | 0 |
| N0055 | 0 | SNP | 11N>S                               | 36.53  | 0 | 36.53  | 0 |
| N0094 | 0 | SNP | 11N>S                               | 75.29  | 1 | 75.29  | 1 |
| N0101 | 0 | SNP | 11N>S                               | 78.9   | 0 | 78.9   | 0 |
| N0141 | 0 | SNP | 11N>S                               | 108.69 | 0 | 108.69 | 0 |
| N0188 | 0 | SNP | 11N>S                               | 49.81  | 1 | 31.56  | 1 |
| N0222 | 1 | SNP | 11N>S                               | 85.18  | 0 | 85.18  | 0 |
| -     | 1 | SNP | 11N>S                               | 39.16  | 0 | 39.16  | 0 |
| -     | 0 | SNP | 11N>S                               | 5.39   | 1 | 0.36   | 1 |
| -     | 0 | SNP | 11N>S                               | 25.02  | 1 | 9.99   | 1 |
| N0263 | 0 | SNP | 11N>S                               | 44.58  | 0 | 44.58  | 0 |
| N0417 | 0 | SNP | 11N>S                               | 48.79  | 0 | 48.79  | 0 |
| N0422 | 0 | SNP | 11N>S                               | 26.83  | 1 | 26.83  | 1 |
| N0433 | 1 | SNP | 11N>S                               | 57.8   | 0 | 57.8   | 0 |
| N0435 | 0 | SNP | 11N>S                               | 8.61   | 0 | 8.61   | 0 |
| N0452 | 0 | SNP | 11N>S                               | 42.44  | 0 | 42.44  | 1 |
| N0479 | 1 | SNP | 11N>S                               | 21.6   | 0 | 21.6   | 0 |
| N0499 | 0 | SNP | 11N>S                               | 44.35  | 0 | 44.35  | 0 |
| N0581 | 1 | SNP | 11N>S                               | 86.53  | 0 | 86.53  | 0 |
| N0585 | 0 | SNP | 11N>S                               | 77.42  | 0 | 77.42  | 0 |
| N0022 | 0 | SNP | 11N>S; 57P>A                        | 79.2   | 0 | 79.2   | 0 |
| N0118 | . | SNP | 59P>S                               | 96.43  | 0 | 96.43  | 0 |
| N0171 | 0 | SNP | 59P>S                               | 39.29  | 0 | 39.29  | 0 |
| N0204 | 0 | SNP | 231P>L                              | 60.82  | 0 | 60.82  | 0 |
| N0191 | 0 | SNP | 11N>S                               | 76.83  | 0 | 76.83  | 0 |

|       |   |     |       |        |   |       |   |
|-------|---|-----|-------|--------|---|-------|---|
| N0393 | 0 | SNP | 11N>S | 128.25 | 0 | 94.03 | 1 |
|-------|---|-----|-------|--------|---|-------|---|

(B) Validation Set

| Case # | Myc <sup>high</sup> | Myc Mutations | AA changes                              | OS     | Status | PFS    | Status |
|--------|---------------------|---------------|-----------------------------------------|--------|--------|--------|--------|
| 1      | 0                   | MUT           | 62S>F;284A>T                            | 12.23  | 0      | 12.23  | 1      |
| 2      | 0                   | MUT           | 329S>N                                  | 0.82   | 0      | 0.82   | 0      |
| 3      | 0                   | MUT           | 150A>T; 263D>N                          | 66.28  | 0      | 66.28  | 0      |
| 4      | 0                   | MUT           | 11N>S; 36Q>X; 255E>K                    | 13.94  | 1      | 13.74  | 1      |
| 5      | 1                   | MUT           | 159S>R                                  | 85.00  | 0      | 7      | 1      |
| 6      | 0                   | MUT           | 179Q>X; 383E>K                          | 10.29  | 0      | 10.29  | 0      |
| 7      | 0                   | MUT           | 79P>S; 377L>P                           | 41.33  | 0      | 14.5   | 1      |
| 8      | 0                   | MUT           | 11N>I; 31F>S; 50W>X; 406V>I             | 13.64  | 0      | 13.64  | 0      |
| 9      | 0                   | MUT           | 84G>R; 185A>T                           | 109.28 | 0      | 13.84  | 1      |
| 10     | 1                   | MUT           | 29E>K                                   | 121.28 | 0      | 121.28 | 0      |
| 11     | 0                   | MUT           | 313P>S                                  | 119.51 | 1      | 119.51 | 1      |
| 12     | 0                   | MUT           | 205P>L                                  | 80.28  | 0      | 53.06  | 1      |
| 13     | 0                   | MUT           | 155A>T; 165A>T; 430K>E                  | 63.65  | 0      | 63.65  | 0      |
| 14     | 0                   | MUT           | 67S>F                                   | 44.09  | 0      | 44.09  | 0      |
| 15     | 1                   | MUT           | 296V>I                                  | 44.09  | 1      | 21.11  | 1      |
| 16     | 0                   | MUT           | 65R>C                                   | 40.87  | 0      | 40.87  | 0      |
| 17     | 0                   | MUT           | 248T>S                                  | 0.95   | 0      | 0.95   | 1      |
| 18     | 0                   | MUT           | 175S>R                                  | 52.54  | 0      | 52.54  | 0      |
| 19     | 1                   | MUT           | 8T>I; 11N>S                             | 52.14  | 0      | 52.14  | 0      |
| 20     | 1                   | MUT           | 138F>C                                  | 24.53  | 0      | 24.53  | 0      |
| 21     | 0                   | MUT           | 191P>S; 245P>S;                         | 45.63  | 0      | 11.11  | 1      |
| 22     | 0                   | MUT           | 123T>I                                  | 36.46  | 0      | 36.46  | 0      |
| 23     | 0                   | MUT           | 64S>N;415S>F;423R>X                     | 45.60  | 0      | 45.6   | 0      |
| 24     | 0                   | MUT           | 228E>G;320P>L, and splicing at 2nd exon | 88.04  | 0      | 88.04  | 0      |
| 25     | 1                   | MUT           | 138F>C                                  | 11.00  | 1      | 11     | 1      |
| 26     | 0                   | MUT           | 79P>S                                   | 67.63  | 0      | 67.63  | 0      |
| 27     | 0                   | MUT           | 335Q>X; frameshift                      | 57.70  | 0      | 32.02  | 1      |
| 28     | 0                   | MUT           | 92S>N                                   | 48.39  | 0      | 48.39  | 0      |
| 29     | 0                   | MUT           | 11N>S;286G>S;418D>N                     | 51.35  | 0      | 51.35  | 0      |
| 30     | 1                   | MUT           | 184A>V                                  | 36.99  | 0      | 36.99  | 0      |
| 31     | 1                   | MUT           | 141A>V                                  | 2.66   | 0      | 2.66   | 0      |
| 32     | 0                   | MUT           | 168H>R;294P>S                           | 52.47  | 0      | 52.47  | 0      |
| 33     | 1                   | MUT           | 67S>F                                   | 11.18  | 0      | 11.18  | 0      |
| 34     | .                   | MUT           | 83R>Q;320P>S                            | 91.76  | 0      | 4.44   | 1      |

|    |   |     |                     |       |   |       |   |
|----|---|-----|---------------------|-------|---|-------|---|
| 35 | . | MUT | 172S>F              | 72.03 | 0 | 72.03 | 0 |
| 36 | . | MUT | 164P>L              | 68.52 | 0 | 68.52 | 0 |
| 37 | . | MUT | 11N>S;179Q>X        | 52.41 | 0 | 52.41 | 0 |
| 38 | . | MUT | 102V>M              | 29.16 | 0 | 29.16 | 0 |
| 39 | . | MUT | 41Q>X;207S>F;310A>V | 88.67 | 0 | 88.67 | 0 |
| 40 | . | MUT | 175S>R;309Y>C       | 4.44  | 1 | 2.17  | 1 |
| 41 | . | MUT | 48D>N;INDEL         | 15.09 | 0 | 15.09 | 0 |
| 42 | . | MUT | 274G>S              | 9.67  | 1 | 9.67  | 1 |
| 43 | . | MUT | 26D>N               | 0.99  | 1 | 0.99  | 1 |
| 44 | . | SNP | 11N>S               | 65.13 | 0 | 65.13 | 0 |
| 45 | 1 | SNP | 170V>I              | 61.61 | 0 | 1.28  | 1 |
| 46 | 0 | SNP | 170V>I              | 60.33 | 0 | 60.33 | 0 |
| 47 | 0 | SNP | 160G>S              | 36.95 | 0 | 36.95 | 0 |
| 48 | 0 | SNP | 11N>S; 33Q>H        | 16.77 | 0 | 16.77 | 0 |
| 49 | 0 | SNP | 11N>S               | 72.53 | 0 | 72.53 | 0 |
| 50 | 0 | SNP | 11N>S               | 49.71 | 0 | 49.71 | 0 |
| 51 | 0 | SNP | 11N>S               | 12.10 | 1 | 11.51 | 1 |
| 52 | 0 | SNP | 11N>S               | 51.91 | 0 | 51.91 | 0 |
| 53 | 0 | SNP | 11N>S               | 48.20 | 0 | 48.2  | 0 |
| 54 | . | SNP | 218P>S              | 68.58 | 0 | 68.58 | 0 |
| 55 | . | SNP | 11N>S               | 23.67 | 0 | 23.67 | 0 |
| 56 | . | SNP | 11N>S               | 54.02 | 0 | 54.02 | 0 |
| 57 | 0 | SNP | 11N>S               | 29.03 | 0 | 29.03 | 0 |

**Abbreviations:** MUT, mutated; SNP, single nucleotide polymorphism; OS, overall survival; PFS, progression-free survival.

**Supplementary Table S4.** Multivariate survival analysis in the study cohort

(A)

| Variables                 | OS   |           |                    | PFS  |           |                    |
|---------------------------|------|-----------|--------------------|------|-----------|--------------------|
|                           | HR   | 95% CI    | <i>P</i>           | HR   | 95% CI    | <i>P</i>           |
| <b>IPI &gt; 2</b>         | 2.65 | 1.82-3.87 | <b>&lt; 0.0001</b> | 2.37 | 1.66-3.38 | <b>&lt; 0.0001</b> |
| <b>Female sex</b>         | 0.70 | 0.48-1.02 | 0.063              | 0.78 | 0.55-1.12 | 0.18               |
| <b>≥5cm tumor</b>         | 1.24 | 0.86-1.80 | 0.25               | 1.19 | 0.83-1.69 | 0.35               |
| <b>B-symptoms</b>         | 1.59 | 1.09-2.31 | <b>0.016</b>       | 1.51 | 1.05-2.15 | <b>0.025</b>       |
| <b>Myc<sup>high</sup></b> | 1.78 | 1.22-2.58 | <b>0.003</b>       | 1.61 | 1.13-2.30 | <b>0.009</b>       |
| <b>Myc mutation</b>       | 0.61 | 0.34-1.11 | 0.11               | 0.57 | 0.32-1.02 | 0.057              |

(B)

| Variables                 | OS   |           |                    | PFS  |           |                    |
|---------------------------|------|-----------|--------------------|------|-----------|--------------------|
|                           | HR   | 95% CI    | <i>P</i>           | HR   | 95% CI    | <i>P</i>           |
| <b>IPI &gt; 2</b>         | 2.31 | 1.57-3.39 | <b>&lt; 0.0001</b> | 2.02 | 1.40-2.91 | <b>&lt; 0.0001</b> |
| <b>Female sex</b>         | 0.77 | 0.52-1.14 | 0.18               | 0.80 | 0.56-1.16 | 0.24               |
| <b>≥5cm tumor</b>         | 1.36 | 0.93-1.99 | 0.11               | 1.30 | 0.90-1.87 | 0.16               |
| <b>B-symptoms</b>         | 1.48 | 1.00-2.18 | <b>0.048</b>       | 1.48 | 1.02-2.15 | <b>0.038</b>       |
| <b>MYC-3'UTR mutation</b> | 2.23 | 1.11-4.46 | <b>0.024</b>       | 1.85 | 0.93-3.69 | 0.079              |

**Abbreviations:** OS, overall survival; PFS, progression-free survival; HR, hazard ratio; CI, confidence interval; IPI, International Prognostic Index. IPI includes age, stage, lactate dehydrogenase level, Eastern Cooperative Oncology Groups performance status, and numbers of extranodal sites.

**Supplementary Table S5.** Molecular characteristics of the 368 patients with diffuse large B-cell lymphoma in the training set with wild-type (WT) or mutated (MUT) *MYC*-UTR

| <b>Variables</b>                       | <b>MUT-3'UTR<br/>N (%)</b> | <b>WT-3'UTR<br/>N (%)</b> |              | <b>MUT-5'UTR<br/>N (%)</b> | <b>WT-5'UTR<br/>N (%)</b> |                   |
|----------------------------------------|----------------------------|---------------------------|--------------|----------------------------|---------------------------|-------------------|
| <b>Ki-67 index</b>                     |                            |                           |              |                            |                           |                   |
| < 70%                                  | 6 (31.6)                   | 115 (33.7)                | 1.00         | 19 (28.4)                  | 102 (34.8)                | 0.39              |
| ≥ 70%                                  | 13 (68.4)                  | 226 (66.3)                |              | 48 (71.6)                  | 191 (65.2)                |                   |
| <b>TP53 mutations</b>                  |                            |                           |              |                            |                           |                   |
| No                                     | 14 (73.7)                  | 261 (78.4)                | 0.63         | 53 (77.9)                  | 222 (78.2)                | 0.97              |
| Yes                                    | 5 (26.3)                   | 72 (21.6)                 |              | 15 (22.1)                  | 62 (21.8)                 |                   |
| <b>MYC translocation</b>               |                            |                           |              |                            |                           |                   |
| No                                     | 9 (90)                     | 221 (87.7)                | 1.00         | 35 (83.3)                  | 195 (88.6)                | 0.31              |
| Yes                                    | 1 (10)                     | 31 (12.3)                 |              | 7 (16.7)                   | 25 (11.4)                 |                   |
| <b>BCL2 translocation</b>              |                            |                           |              |                            |                           |                   |
| No                                     | 13 (81.3)                  | 242 (81.2)                | 1.00         | 45 (80.4)                  | 210 (81.4)                | 0.85              |
| Yes                                    | 3 (18.8)                   | 56 (18.8)                 |              | 11 (19.6)                  | 48 (18.6)                 |                   |
| <b>MYC CDS mutations</b>               |                            |                           |              |                            |                           |                   |
| Mutations                              | 4 (20)                     | 47 (13.8)                 | 0.50         | 22 (31.9)                  | 30 (10.0)                 | <b>&lt;0.0001</b> |
| WT                                     | 16 (80)                    | 301 (86.2)                |              | 47 (68.1)                  | 270 (90.0)                |                   |
| <b>MYC 5'UTR mutations</b>             |                            |                           |              |                            |                           |                   |
| Mutations                              | 7 (33.3)                   | 62 (17.8)                 | <b>0.077</b> |                            |                           |                   |
| WT                                     | 14 (66.7)                  | 286 (82.2)                |              |                            |                           |                   |
| <b>MYC 3'UTR mutations</b>             |                            |                           |              |                            |                           |                   |
| Mutations                              |                            |                           |              | 7 (10.1)                   | 13 (4.3)                  | <b>0.073</b>      |
| WT                                     |                            |                           |              | 62 (89.9)                  | 286 (95.7)                |                   |
| <b>p53 expression</b>                  |                            |                           |              |                            |                           |                   |
| < 20%                                  | 12 (63.2)                  | 200 (62.1)                | 1.00         | 42 (62.7)                  | 170 (62)                  | 1.00              |
| ≥ 20%                                  | 7 (36.8)                   | 122 (37.9)                |              | 25 (37.3)                  | 104 (38)                  |                   |
| <b>MDM2 expression</b>                 |                            |                           |              |                            |                           |                   |
| < 20%                                  | 11 (55)                    | 193 (57.1)                | 1.00         | 37 (53.6)                  | 167 (57.8)                | 0.59              |
| ≥ 20%                                  | 9 (45)                     | 145 (42.9)                |              | 32 (46.4)                  | 122 (42.2)                |                   |
| <b>p21 expression</b>                  |                            |                           |              |                            |                           |                   |
| Negative                               | 13 (68.4)                  | 229 (71.1)                | 0.80         | 46 (68.7)                  | 196 (71.5)                | 0.65              |
| Positive                               | 6 (31.6)                   | 93 (28.9)                 |              | 21 (31.3)                  | 78 (28.5)                 |                   |
| <b>p16 expression</b>                  |                            |                           |              |                            |                           |                   |
| ≤ 10%                                  | 10 (71.4)                  | 175 (63.9)                | 0.78         | 30 (65.2)                  | 155 (64)                  | 1.00              |
| > 10%                                  | 4 (28.6)                   | 99 (36.1)                 |              | 16 (34.8)                  | 87 (36)                   |                   |
| <b>Myc<sup>high</sup> expression</b>   |                            |                           |              |                            |                           |                   |
| < 70%                                  | 17 (85)                    | 226 (66.9)                | 0.13         | 40 (61.5)                  | 203 (69.3)                | 0.24              |
| ≥ 70%                                  | 3 (15)                     | 112 (33.1)                |              | 25 (38.5)                  | 90 (30.7)                 |                   |
| <b>Bcl-2<sup>high</sup> expression</b> |                            |                           |              |                            |                           |                   |
| < 70%                                  | 10 (50)                    | 179 (52.8)                | 0.82         | 37 (53.6)                  | 152 (52.4)                | 0.89              |
| ≥ 70%                                  | 10 (50)                    | 160 (47.2)                |              | 32 (46.4)                  | 138 (47.6)                |                   |
| <b>Bcl-6 expression</b>                |                            |                           |              |                            |                           |                   |

|                                         |           |            |             |           |            |               |
|-----------------------------------------|-----------|------------|-------------|-----------|------------|---------------|
| ≤ 30%                                   | 2 (10)    | 76 (22.5)  | 0.27        | 6 (9)     | 72 (24.7)  | <b>0.0048</b> |
| > 30%                                   | 18 (90)   | 262 (77.5) |             | 61 (91)   | 219 (75.3) |               |
| <b>GCET1 expression</b>                 |           |            |             |           |            |               |
| < 50%                                   | 9 (45)    | 229 (67.8) | <b>0.05</b> | 42 (60.9) | 196 (67.8) | 0.32          |
| ≥ 50%                                   | 11 (55)   | 109 (32.2) |             | 27 (39.1) | 93 (32.2)  |               |
| <b>CD5 expression</b>                   |           |            |             |           |            |               |
| Negative                                | 19 (95)   | 318 (93.5) | 1.00        | 64 (95.5) | 273 (93.2) | 0.59          |
| Positive                                | 1 (5)     | 22 (6.5)   |             | 3 (4.5)   | 20 (6.8)   |               |
| <b>CD10 expression</b>                  |           |            |             |           |            |               |
| < 40%                                   | 13 (65)   | 210 (61)   | 0.82        | 38 (55.1) | 185 (62.7) | 0.27          |
| ≥ 40%                                   | 7 (35)    | 134 (39)   |             | 31 (44.9) | 110 (37.3) |               |
| <b>CD30 expression</b>                  |           |            |             |           |            |               |
| Negative                                | 16 (80)   | 289 (84.3) | 0.54        | 60 (87)   | 245 (83.3) | 0.58          |
| Positive                                | 4 (20)    | 54 (15.7)  |             | 9 (13)    | 49 (16.7)  |               |
| <b>PI3K<sup>high</sup> expression</b>   |           |            |             |           |            |               |
| < 70%                                   | 13 (68.4) | 215 (70)   | 1.00        | 38 (70.4) | 190 (69.9) | 1.00          |
| ≥ 70%                                   | 6 (31.6)  | 92 (30)    |             | 16 (29.6) | 82 (30.1)  |               |
| <b>pSTAT3<sup>high</sup> expression</b> |           |            |             |           |            |               |
| < 50%                                   | 18 (100)  | 234 (81.3) | <b>0.05</b> | 47 (88.7) | 205 (81)   | 0.24          |
| ≥ 50%                                   | 0 (0)     | 54 (18.8)  |             | 6 (11.3)  | 48 (19)    |               |
| <b>pAKT<sup>high</sup> expression</b>   |           |            |             |           |            |               |
| ≤ 60%                                   | 15 (78.9) | 268 (81)   | 0.23        | 47 (77)   | 236 (81.7) | 0.47          |
| > 60%                                   | 4 (21.1)  | 63 (19)    |             | 14 (23)   | 53 (18.3)  |               |
| <b>p63 expression</b>                   |           |            |             |           |            |               |
| < 10%                                   | 9 (45)    | 188 (57.1) | 0.35        | 34 (54)   | 163 (57)   | 0.68          |
| ≥ 10%                                   | 11 (55)   | 141 (42.9) |             | 29 (46)   | 123 (43)   |               |
| <b>BLIMP-1 expression</b>               |           |            |             |           |            |               |
| < 10%                                   | 14 (73.7) | 237 (72.3) | 1.00        | 50 (75.8) | 201 (71.5) | 0.54          |
| ≥ 10%                                   | 5 (26.3)  | 91 (27.7)  |             | 16 (24.2) | 80 (28.5)  |               |
| <b>Nuclear p50 expression</b>           |           |            |             |           |            |               |
| Negative                                | 10 (52.6) | 145 (48.2) | 0.81        | 28 (50.9) | 127 (47.9) | 0.77          |
| Positive                                | 9 (47.4)  | 156 (51.8) |             | 27 (49.1) | 138 (52.1) |               |
| <b>Nuclear p52 expression</b>           |           |            |             |           |            |               |
| Negative                                | 14 (73.7) | 227 (71.8) | 1.00        | 44 (75.9) | 197 (71.1) | 0.52          |
| Positive                                | 5 (26.3)  | 89 (28.2)  |             | 14 (24.1) | 80 (28.9)  |               |
| <b>Nuclear p65 expression</b>           |           |            |             |           |            |               |
| Negative                                | 8 (42.1)  | 128 (41)   | 1.00        | 29 (49.2) | 107 (38.9) | 0.18          |
| Positive                                | 11 (57.9) | 184 (59)   |             | 30 (50.8) | 168 (61.1) |               |
| <b>Nuclear RelB expression</b>          |           |            |             |           |            |               |
| Negative                                | 15 (88.2) | 267 (87.3) | 1.00        | 51 (89.5) | 231 (86.8) | 0.67          |
| Positive                                | 2 (11.8)  | 39 (12.7)  |             | 6 (10.5)  | 35 (13.2)  |               |
| <b>Nuclear c-Rel expression</b>         |           |            |             |           |            |               |
| Negative                                | 12 (63.2) | 204 (68.9) | 0.62        | 40 (72.7) | 176 (67.7) | 0.52          |
| Positive                                | 7 (36.8)  | 92 (31.1)  |             | 15 (27.3) | 84 (32.3)  |               |



---

| <b>CXCR4 expression</b> |           |            |      |           |            |      |
|-------------------------|-----------|------------|------|-----------|------------|------|
| < 20%                   | 12 (63.2) | 219 (71.1) | 0.45 | 39 (70.9) | 192 (70.6) | 1.00 |
| ≥ 20%                   | 7 (36.8)  | 89 (28.9)  |      | 16 (29.1) | 80 (29.4)  |      |

---

**Abbreviations:** UTR, untranslated region. Some biomarkers' data were missing due to laboratory failure or tissue exhaustion.

**Supplementary Table S6.** Lists of *MYC* 3'UTR mutations found in the study cohort and corresponding patient survival.

**(A) Training Set**

| Accession # | CDS       |                | 5'UTR mutations | 3'UTR mutations | miR-TS                                                         | Recurrent | Myc <sup>high</sup> OS | Status | PFS    | Status |
|-------------|-----------|----------------|-----------------|-----------------|----------------------------------------------------------------|-----------|------------------------|--------|--------|--------|
|             | mutations | AA changes     |                 |                 |                                                                |           |                        |        |        |        |
| N0111       | MUT       | 401A>T         | MUT             | MUT             |                                                                |           | 0 13.02                | 1      | 13.02  | 1      |
| N0183       | MUT       | 421R>Q         | WT              | MUT             |                                                                | *368C     | 0 14.24                | 1      | 4.31   | 1      |
| N0230       | MUT       | 364R>H; 421R>W | MUT             | MUT             | mir-24<br>mir-331;<br>mir34a, Let-7<br>7adef, mir-135a, 449abc |           | 1 74.76                | 0      | 74.76  | 0      |
| N0311       | MUT       | 39E>K; 250S>N  | MUT             | MUT             |                                                                |           | 0 7.59                 | 1      | 7.59   | 1      |
| N0141       | SNP       | 11N>S          | WT              | MUT             |                                                                |           | 0 108.69               | 0      | 108.69 | 0      |
| N0048       | WT        |                | WT              | MUT             |                                                                |           | 0 51.09                | 0      | 51.09  | 0      |
| N0069       | WT        |                | MUT             | MUT             |                                                                |           | 0 56.94                | 0      | 56.94  | 0      |
| N0099       | WT        |                | WT              | MUT             | mir-24                                                         |           | 0 80.65                | 1      | 80.65  | 1      |
| N0113       | WT        |                | WT              | MUT             |                                                                |           | 1 73.58                | 1      | 73.58  | 1      |
| N0023       | WT        |                | WT              | MUT             |                                                                | *2G       | 0 16.67                | 1      | 16.67  | 1      |
| N0191       | WT        |                | MUT             | MUT             |                                                                | *2G       | 0 76.83                | 0      | 76.83  | 0      |
| N0196       | WT        |                | WT              | MUT             | mir-331                                                        |           | 0 67.59                | 0      | 67.59  | 0      |
| -           | WT        |                | MUT             | MUT             |                                                                |           | 0 39.58                | 0      | 39.58  | 1      |
| N0325       | WT        |                | MUT             | MUT             | mir-196b                                                       | *22C      | 0 19.36                | 1      | 19.36  | 1      |
| N0062       | WT        |                | WT              | MUT             | mir-196b                                                       | *22C      | 0 2.76                 | 1      | 2.76   | 1      |
| N0388       | WT        |                | WT              | MUT             |                                                                |           | 0 4.41                 | 1      | 4.41   | 1      |
| N0424       | WT        |                | WT              | MUT             | mir-24                                                         |           | 0 29.46                | 1      | 29.46  | 1      |
| N0516       | WT        |                | WT              | MUT             |                                                                |           | 0 16.83                | 0      | 16.83  | 0      |
| N0541       | WT        |                | SNP             | MUT             | mir-34a;Let7-<br>a,d,e,f; mir-98;<br>mir-449a,b,c;             |           | 0 36.16                | 0      | 36.16  | 0      |
| N0570       | WT        |                | WT              | MUT             |                                                                |           | 1 98.99                | 1      | 98.99  | 1      |

**(B) Validation Set**

| Case # | CDS       |                                            | 5'UTR mutations | 3'UTR mutations | miR-TS<br>Recurrent | Myc <sup>high</sup> OS | Status | PFS  | Status |
|--------|-----------|--------------------------------------------|-----------------|-----------------|---------------------|------------------------|--------|------|--------|
|        | Mutations | AA changes                                 |                 |                 |                     |                        |        |      |        |
| 13     | MUT       | 155A>T; 165A>T;<br>430K>E.                 | MUT             | MUT             | mir-429<br>*345C    | 0 63.65                | 0      | 63.7 | 0      |
| 24     | MUT       | 228E>G;320P>L, and<br>splicing at 2nd exon | MUT             | MUT             |                     | 0 88.04                | 0      | 88   | 0      |
| 25     | MUT       | 138F>C                                     | MUT             | MUT             | mir-24              | 1 11.00                | 1      | 11   | 1      |
| 27     | MUT       | 335Q>X; frameshift                         | WT              | MUT             | mir-33b             | 0 57.70                | 0      | 32   | 1      |
| 29     | MUT       | 11N>S;286G>S;418D>N                        | MUT             | MUT             |                     | 0 51.35                | 0      | 51.4 | 0      |

|    |     |               |     |     |                 |   |       |   |       |   |
|----|-----|---------------|-----|-----|-----------------|---|-------|---|-------|---|
| 31 | MUT | 141A>V        | MUT | MUT |                 | 1 | 2.66  | 0 | 2.66  | 0 |
| 34 | MUT | 83R>Q;320P>S  | MUT | MUT | mir-148a-5p     | . | 91.76 | 0 | 4.44  | 1 |
| 40 | MUT | 175S>R;309Y>C | WT  | MUT |                 | . | 4.44  | 1 | 2.17  | 1 |
| 51 | SNP | 11N>S         | MUT | MUT |                 | 0 | 12.10 | 1 | 11.5  | 1 |
| 57 | SNP | 11N>S         | WT  | MUT |                 | 0 | 29.03 | 0 | 29    | 0 |
| 58 | WT  |               | SNP | MUT | mir-33b<br>*83G | 0 | 4.11  | 1 | 4.11  | 1 |
| 59 | WT  |               | WT  | MUT | mir-33b<br>*83G | 0 | 48.89 | 1 | 10.92 | 1 |
| 60 | WT  |               | WT  | MUT | mir-331         | 1 | 23.08 | 0 | 23.1  | 0 |
| 61 | WT  |               | SNP | MUT |                 | 0 | 45.30 | 0 | 45.3  | 0 |
| 62 | WT  |               | WT  | MUT | mir-24          | . | 80.12 | 0 | 8.98  | 1 |

**Abbreviations:** UTR, untranslated region; WT, wild type; MUT, mutated; SNP, single nucleotide polymorphism; OS, overall survival; PFS, progression-free survival.

**Supplementary Table S7.** Gene profiling comparisons between wild-type (WT) and mutated (MUT) *MYC*.

**(A)** Differentially expressed genes between patients expressing Myc T58 mutants and patients expressing WT-Myc (false discovery rate: 0.01)

| Function                                          | Upregulated                                                                                 | Down regulated     |
|---------------------------------------------------|---------------------------------------------------------------------------------------------|--------------------|
| Signaling transduction; ion channel               | <i>FGD4, BMP3, GRIK3, MUC13, MUC3A/B, BEST3, MUC17, TRPC4</i>                               |                    |
| Transcription regulation                          | <i>NR1H4, FOXL1, EPS8L3, TFDP2, TCEB2, HNF4G, ZNF73, ZNF717</i>                             | <i>ZMIZ1, ELK3</i> |
| Cell adhesion, cytoskeleton, extracellular matrix | <i>TUBAL3, TINAG, SCIN, SPTA1</i>                                                           | <i>FNBP1</i>       |
| Immune response, inflammation                     | <i>NCR3LG1/DKFZp686O24166, MEP1B</i>                                                        |                    |
| Apoptosis                                         | <i>PEG10, ZNF385B</i>                                                                       |                    |
| Metabolism                                        | <i>MTTP, FABP6, ALDOB, GCG, AGPAT5, SLC10A2, ENPEP, SCLY, C8orf38</i>                       |                    |
| Protein degradation, chaperone                    | <i>DNAJC21</i>                                                                              |                    |
| lncRNA genes; Unknown function                    | <i>TM4SF20, KIAA2022, LOC284422, LOC100129961, BTNL8, LOC257396, C22orf34, LOC100287163</i> |                    |

**(B)** Differentially expressed genes between patients with 3'UTR mutations recurrent in the DLBCL cohort and patients with WT-3'UTR (false discovery rate: 0.10)

| Function                                                                   | Upregulated                                                                                    | Downregulated            |
|----------------------------------------------------------------------------|------------------------------------------------------------------------------------------------|--------------------------|
| miRNA-mediated gene suppression                                            |                                                                                                | <i>TNRC6B</i>            |
| Signaling transduction; ion channel                                        | <i>KCNK6, MARK1, FGFR1OP2, DACT1, ITPR3, WISP2, RABL2A/B, OR10A5, RHOBTB3, ARHGAP28, OPRM1</i> |                          |
| Mitosis, cell cycle, DNA replication and DNA repair                        | <i>ENDOG, PARD6B, CEP70, ESCO2</i>                                                             | <i>RAD1, ADSL, BOLA2</i> |
| Cell adhesion, migration, cytoskeleton and extracellular matrix remodeling | <i>RAPH1, SPTAN1, LOXL4, DNAH1, HPSE, MYLK, PSG6</i>                                           |                          |
| Transcription regulation                                                   | <i>ZNF667, MAGEA2B, MAGEA2, HDAC9, ZNF415, SOHLH2</i>                                          |                          |
| Protein synthesis, processing, trafficking, transporters                   | <i>DNAJC5, ENOX2, PPP1R3F, MUDENG,</i>                                                         | <i>SRP68</i>             |

|                                                 |                                                                                                                            |
|-------------------------------------------------|----------------------------------------------------------------------------------------------------------------------------|
| <b>Metabolism</b>                               | <i>HPRT1, APOF, EXT1, WBSCR27</i>                                                                                          |
| <b>Immune responses, antibacterial activity</b> | <i>C17orf87, DEFB106A/B</i>                                                                                                |
| <b>Neuroendocrine differentiation</b>           | <i>DLK1</i>                                                                                                                |
| <b>lncRNA genes</b>                             | <i>DKFZp434H1419, DKFZP434H168</i> <span style="float: right;"><i>HERC2P2/3</i></span>                                     |
| <b>Unknown function</b>                         | <i>KLHL18, C9orf114, CCDC78, NT5DC2, LOC554203, TMEM39A, N4BP2L1, GRAMD2, LOC152274, C18orf8, LRTM1, KRTAP9-2/KRTAP9-8</i> |

**(C) Differentially expressed genes between patients with nonsense Myc mutants and patients expressing WT-Myc (false discovery rate: 0.05)**

| <b>Function</b>                                                                 | <b>Upregulated</b>                                                        | <b>Down regulated</b> |
|---------------------------------------------------------------------------------|---------------------------------------------------------------------------|-----------------------|
| <b>Immune response, antibacterial and antifungal activities, detoxification</b> | <i>CCL28, SMR3A, SMR3B, HTN3, HTN1, MUC7, STATH, DEFB1, SAA1/2, TGFB2</i> |                       |
| <b>Signaling transduction; ion channel</b>                                      | <i>LPAR3, PROM1, MCOLN3, ANXA3, FGFR2</i>                                 | <i>FOXH1</i>          |
| <b>Transcription regulation</b>                                                 | <i>ELF5, MEIS1, OVOL2</i>                                                 |                       |
| <b>Cell adhesion, cytoskeleton, extracellular matrix</b>                        | <i>NEBL, CLDN8, SORBS2, ODAM</i>                                          |                       |
| <b>Apoptosis</b>                                                                | <i>PHLDA1</i>                                                             |                       |
| <b>Metabolism, transporters, trafficking, degradation, chaperone</b>            | <i>TF, AZGP1, SLC34A2, ZFYVE16, AP4S1, PASK, CSN3, CNKSR3</i>             |                       |
| <b>Differentiation</b>                                                          | <i>FOXQ1, GULP1</i>                                                       |                       |
| <b>Neural function</b>                                                          | <i>ENPP5, NTNG1</i>                                                       |                       |
| <b>lncRNA genes; Unknown function</b>                                           | <i>C21orf37, ZG16B, PIP, LOC100129410</i>                                 |                       |

**(D) Differentially expressed genes between patients expressing Myc-11S variant and patients expressing WT-Myc-11N (false discovery rate: 0.05)**

| <b>Function</b>                            | <b>Upregulated</b>                                                             | <b>Down regulated</b> |
|--------------------------------------------|--------------------------------------------------------------------------------|-----------------------|
| <b>Signaling transduction; ion channel</b> | <i>GNG13, HTR2C, RGS5, NLK, RAPGEF4, RASGEF1B, RAPGEF5, RGS4, TAAR2, EPHA5</i> |                       |
| <b>Mitosis, DNA repair, RNA helicases</b>  | <i>INSC, PMS1, DDX3Y, CENPI</i>                                                |                       |

|                                                                                                |                                                                                                                |
|------------------------------------------------------------------------------------------------|----------------------------------------------------------------------------------------------------------------|
| <b>Transcription regulation</b>                                                                | <i>SOX9, HIPK1, KLF15, ESRRG, ZNF876P, FOXN2, ZNF625, ZNF20, GATA4, ZNF350, SALL3</i>                          |
| <b>Metabolism</b>                                                                              | <i>CYP39A1, TMEM135, GAD2</i>                                                                                  |
| <b>Cell adhesion, migration, cytoskeletal organization, microtubules, extracellular matrix</b> | <i>MKLN1, PPFIA1, THSD7A, COL6A6, NCAM1, GIT2, TLL1, ADAMTS19</i>                                              |
| <b>Degradation, trafficking</b>                                                                | <i>WDR20, FBXO30, USP9Y</i>                                                                                    |
| <b>Immune response, inflammation, apoptosis</b>                                                | <i>RAGE, HMCN1, S100A12, IGLL1, IFNA5</i>                                                                      |
| <b>Potential tumor suppressor</b>                                                              | <i>CSMD1</i>                                                                                                   |
| <b>Neural function</b>                                                                         | <i>NLGN4X, bNLGN4Y, SLITRK5, SEZ6L, FAT3</i>                                                                   |
| <b>lncRNA genes; Unknown function</b>                                                          | <i>C8orf12, C6orf99, YIPF6, LOC100144602, ZNF321, PHF20L1, SLMO1, C20orf197, C9orf93, LOC731157, LOC284950</i> |

**Supplementary Table S8.** Brief summary of the major findings by this study

| <b>MYC Mutations (in 33% DLBCL)</b>                                                                           |                                                                        |                                                      |                                                                                                                                                                                                                                                                                              |                                                                                                                                                                             |                                                                                                                                                                                                                                                                                                                         |
|---------------------------------------------------------------------------------------------------------------|------------------------------------------------------------------------|------------------------------------------------------|----------------------------------------------------------------------------------------------------------------------------------------------------------------------------------------------------------------------------------------------------------------------------------------------|-----------------------------------------------------------------------------------------------------------------------------------------------------------------------------|-------------------------------------------------------------------------------------------------------------------------------------------------------------------------------------------------------------------------------------------------------------------------------------------------------------------------|
| <b>Classification by mutation positions</b>                                                                   | <b>Associated prognostic effect</b>                                    | <b>Expression levels (vs. wild-type Myc)</b>         | <b>Prognostic effect of Myc overexpression (Myc<sup>high</sup>)</b>                                                                                                                                                                                                                          | <b>Functional impact by functional and GEP study</b>                                                                                                                        | <b>Other associated clinicopathologic factors in this study cohort</b>                                                                                                                                                                                                                                                  |
| <b>(I) Nonsynonymous CDS mutations (in 16% DLBCL)</b>                                                         |                                                                        |                                                      |                                                                                                                                                                                                                                                                                              |                                                                                                                                                                             |                                                                                                                                                                                                                                                                                                                         |
|                                                                                                               | Variable (specified as below)                                          | Similar                                              | No effect in either GCB- or ABC-DLBCL after excluding T58/F138 mutations (compared to the adverse effect of wild-type Myc overexpression in both GCB and ABC). (In contrast, <i>MYC-R</i> <sup>+</sup> correlated with poor survival in GCB-DLBCL independent of <i>MYC</i> mutation status) | Most were loss-of-function mutations (reduced proliferation and apoptosis), and probably had different tumor microenvironment compared with DLBCL with wild-type <i>MYC</i> | in overall DLBCL, associated with <i>MYC</i> -5'UTR mutations, CD10 <sup>+</sup> , PI3K <sup>high</sup> , and less p52 <sup>+</sup> ; in GCB-DLBCL, associated with nodal DLBCL, <i>MYC-R</i> <sup>+</sup> , and less CD30 <sup>+</sup> ; in ABC-DLBCL, associated with <i>BCL6-R</i> <sup>+</sup> and p63 <sup>+</sup> |
| <b>(I.1) Mutations associated with poor survival (in ~1.1% of DLBCL)</b>                                      |                                                                        |                                                      |                                                                                                                                                                                                                                                                                              |                                                                                                                                                                             |                                                                                                                                                                                                                                                                                                                         |
| T58/F138 mutations                                                                                            |                                                                        | Higher                                               | N/A (all overexpressed)                                                                                                                                                                                                                                                                      | see GEP signatures in Table S7                                                                                                                                              | <i>MYC-R</i> <sup>+</sup>                                                                                                                                                                                                                                                                                               |
| <b>(I.2) Mutations associated with better survival (in ~6.3% of LBCL)</b>                                     |                                                                        |                                                      |                                                                                                                                                                                                                                                                                              |                                                                                                                                                                             |                                                                                                                                                                                                                                                                                                                         |
| Some recurrent (≥2 occurrence in our cohort) non-T58/F138 mutations                                           |                                                                        | Higher                                               | No effect                                                                                                                                                                                                                                                                                    | No GEP signatures                                                                                                                                                           |                                                                                                                                                                                                                                                                                                                         |
| Nonsense, frame-shift, and splicing mutations                                                                 |                                                                        | Lower                                                | No effect                                                                                                                                                                                                                                                                                    | see GEP signatures in Table S7                                                                                                                                              |                                                                                                                                                                                                                                                                                                                         |
| <b>(I.3) Other mutations (in ~8.5% of DLBCL) (probably mix of beneficial, neutral, and harmful mutations)</b> |                                                                        |                                                      |                                                                                                                                                                                                                                                                                              |                                                                                                                                                                             |                                                                                                                                                                                                                                                                                                                         |
|                                                                                                               |                                                                        | Similar                                              | No effect                                                                                                                                                                                                                                                                                    | No GEP signatures                                                                                                                                                           |                                                                                                                                                                                                                                                                                                                         |
| <b>(II) 5'UTR mutations (in 20% patients)</b>                                                                 |                                                                        |                                                      |                                                                                                                                                                                                                                                                                              |                                                                                                                                                                             |                                                                                                                                                                                                                                                                                                                         |
|                                                                                                               | No effect (possible adverse effect in <i>MYC-R</i> <sup>-</sup> cases) | No association                                       |                                                                                                                                                                                                                                                                                              | No GEP signatures                                                                                                                                                           | <i>MYC</i> -CDS mutations, and Bcl-6 <sup>+</sup>                                                                                                                                                                                                                                                                       |
| <b>(III) 3'UTR mutations (in 5.8% patients)</b>                                                               |                                                                        |                                                      |                                                                                                                                                                                                                                                                                              |                                                                                                                                                                             |                                                                                                                                                                                                                                                                                                                         |
|                                                                                                               | Only recurrent mutations showed adverse effect (in 1.3% of DLBCL)      | No association                                       |                                                                                                                                                                                                                                                                                              | Might have differences in microRNA function, apoptosis and DNA repair                                                                                                       | Men                                                                                                                                                                                                                                                                                                                     |
| <b>Single Nucleotide Polymorphisms</b>                                                                        |                                                                        |                                                      |                                                                                                                                                                                                                                                                                              |                                                                                                                                                                             |                                                                                                                                                                                                                                                                                                                         |
|                                                                                                               | <b>Associated prognostic effect</b>                                    | <b>Expression levels (vs. the canonical Myc-11N)</b> | <b>Prognostic effect of Myc overexpression (Myc<sup>high</sup>)</b>                                                                                                                                                                                                                          | <b>Functional impact by functional and GEP study</b>                                                                                                                        | <b>Other associated clinicopathologic factors in this study cohort</b>                                                                                                                                                                                                                                                  |
| <b>N11S (in 6.5% of DLBCL)</b>                                                                                | Better survival                                                        | Lower                                                | No effect ( <i>Myc</i> <sup>high</sup> was associated with a trend towards better survival <i>P</i> =0.22)                                                                                                                                                                                   | Alterations in immunity, apoptosis and DNA repair                                                                                                                           | Less MDM2 <sup>+</sup> , CD5 <sup>+</sup> , and trend of smaller tumor size                                                                                                                                                                                                                                             |

---

**Abbreviations:** DLBCL, diffuse large B-cell lymphoma ; GCB, germinal center B-cell-like; ABC, activated B-cell-like; CDS, coding sequence; UTR, untranslated regions; *MYC*-R, *MYC* rearrangement; Myc<sup>high</sup>, high levels of Myc expression, GEP, gene expression profiling.



## LEGENDS FOR SUPPLEMENTARY FIGURES

**Supplementary Figure S1.** Survival analysis for *MYC* mutations in diffuse large B-cell lymphoma (DLBCL). **(A)** In germinal center B-cell–like DLBCL (GCB-DLBCL), both somatic mutations and single nucleotide polymorphisms in the *MYC* coding sequence leading to a mutated Myc (MUT-MYC) or polymorphic Myc (SNP-MYC) were associated with strong trends toward better progression-free survival (PFS) than wild type Myc (WT-MYC). **(B)** In activated B-cell–like DLBCL (ABC-DLBCL), patients with SNP-MYC had significant better PFS than those with WT-MYC; there was no significant difference in PFS between patients with MUT-MYC and those with WT-MYC although MUT-MYC patients had a slight better PFS rate. **(C-D)** Between homozygous (homo) and heterozygous (hetero) mutations (MUT), and between homozygous and heterozygous SNPs in the *MYC* coding sequence, there were no significant differences in overall survival (OS) or PFS. **(E-F)** In both GCB-DLBCL and ABC-DLBCL with non-T58/F138 MUT-MYC, MUT-Myc expression levels did not show adverse prognostic impact. **(G-H)** In the training set, the favorable prognosis associated with *MYC* variants (MUT or SNP) compared with wild-type Myc (WT-MYC) was only shown in patients without *MYC* rearrangements (*MYC*-R). **(I-J)** In the validation set, the favorable prognosis associated with *MYC* variants compared with wild-type Myc was only shown in patients without *MYC* rearrangements. **(K)** Among WT-Myc GCB-DLBCL patients in the training set, *MYC* rearrangement was associated with significantly poorer PFS. **(L)** In MUT-Myc GCB-DLBCL patients, *MYC* rearrangement was also associated with significantly poorer PFS.

**Supplementary Figure S2.** Comparison of Myc levels and gene expression profiles between DLBCL groups. **(A)** In the DLBCL subset without *MYC* rearrangements (*MYC*-R<sup>-</sup>), there was no significant difference between the levels of wild-type (WT) or mutated Myc (*MUT*-Myc) (though *MUT*-Myc/*MYC*-R<sup>-</sup> compared with the *WT*-Myc/*MYC*-R<sup>-</sup> group showed a slight trend of lower Myc expression levels), but the expression of germline variants (SNP-Myc) was significantly lower than both *MUT*-Myc/*MYC*-R<sup>-</sup> and *WT*-Myc/*MYC*-R<sup>-</sup> groups. **(B)** In the DLBCL subset with *MYC* rearrangements (*MYC*-R<sup>+</sup>), the *MUT*-Myc/*MYC*-R<sup>+</sup> group had a trend of higher mean level of Myc expression compared with the *WT*-Myc/*MYC*-R<sup>+</sup> group. **(C)** In the *MYC*-R<sup>+</sup> DLBCL subset, after excluding T58/F138-*MUT*-Myc cases from the *MUT*-Myc/*MYC*-R<sup>+</sup> group, there was no significant difference in Myc levels between the *MUT*-Myc/*MYC*-R<sup>+</sup> and *WT*-Myc/*MYC*-R<sup>+</sup> groups. **(D)** Heatmap of GEP comparison between Myc T58 mutants and DLBCL expressing WT-Myc. Differentially expressed genes are listed in Supplementary Table S7A. **(E)** Heatmap of GEP comparison between DLBCL with *MYC* 3'UTR mutations recurrent in the DLBCL cohort and DLBCL with WT-*MYC*-3'UTR. Differentially expressed genes are listed in Supplementary Table S7B. **(F)** Heatmap of GEP comparison between DLBCL with nonsense Myc mutants and DLBCL expressing WT-Myc. Differentially expressed genes are listed in Supplementary Table S7C. **(G)** Heatmap of GEP comparison between DLBCL expressing WT-Myc-11S variant and DLBCL expressing WT-Myc-11N. Differentially expressed genes are listed in Supplementary Table S7D.

**Supplementary Figure S3.** Differential expression of genes between the *WT*-Myc and *MUT*-Myc groups. **(A-J)** The *MUT*-Myc group compared with the *WT*-Myc group had significantly increased *MYC*, *MDM2*, *TP63*, *CD10*, and *CD22* mRNA, and decreased *STAT3*, *STAT5A*, *CD44*,

*ICAM1*, and *TNFSF13B/BAFF* mRNA levels. **(K)** *FBXW9* mRNA expression was significantly lower in the *MUT-Myc* group compared with WT-Myc<sup>low</sup> and WT-Myc<sup>high</sup>. **(L-T)** *MDM2*, *TP63*, *CD10*, *CD22*, *STAT3*, *STAT5A*, *CD44*, *ICAM1*, and *TNFSF13B/BAFF* did not show significant up- or downregulation in the WT-Myc<sup>high</sup> compared with the WT-Myc<sup>low</sup> group, whereas appeared to “gain” higher or lower expression in the *MUT-Myc* group.

**Note:** Y-axes represent Log2 values of microarray expression data. Red asterisks \* indicate significant ( $P \leq 0.05$ ) upregulation and green asterisks \* indicate significant downregulation.

**Supplementary Figure S4.** Comparison of gene expression between the *WT-Myc* and *MUT-Myc* groups. **(A-B)** The *MUT-Myc* group compared with the *WT-Myc* group had significantly decreased *CTLA4* and *ICOS* mRNA levels. **(C)** Both the *MUT-Myc* group and the WT-Myc<sup>high</sup> group had lower levels of *CTLA4* mRNA than the WT-Myc<sup>low</sup> group. **(D)** The *MUT-Myc* group had lower level of *ICOS* mRNA than both the WT-Myc<sup>low</sup> and WT-Myc<sup>high</sup> groups (significant  $P$  and marginal  $P$  values respectively). **(E)** The *MUT-Myc* group compared with the *WT-Myc* group had decreased *HLA* mRNA levels (here shows the mean values of *HLA-A*, *-B*, *-C*, *-E*, and *-F*) with a border-line  $P$  value. **(F)** The *MUT-Myc* group showed decreased *HLA* mRNA levels compared with the group with canonical *WT-Myc*. **(G)** Both the *MUT-Myc* group and the WT-Myc<sup>high</sup> group had lower levels of *HLA* mRNA than the WT-Myc<sup>low</sup> group. **(H)** The *MUT-Myc* group (but not the WT-Myc<sup>high</sup> group) had significantly higher level of *CDKN2A* mRNA compared with the WT-Myc<sup>low</sup> group. **(I)** The *MUT-Myc* group (but not the WT-Myc<sup>high</sup> group) showed trends of decreased level of *BCL2* mRNA compared with the WT-Myc<sup>low</sup> and WT-Myc<sup>high</sup> groups. **(J)** The *MUT-Myc* group had significantly lower levels of *PMAIP1/NOXA* mRNA compared with the WT-Myc<sup>high</sup> group; *PMAIP1/NOXA* upregulation correlated with high

level of WT-Myc expression. **(K)** The WT-Myc<sup>high</sup> but not *MUT-Myc* group had significantly higher level of *TP53* mRNA compared with the WT-Myc<sup>low</sup> group. **(L)** The WT-Myc<sup>high</sup> but not *MUT-Myc* group had significantly higher level of *BCL2L11/BIM* mRNA compared with the WT-Myc<sup>low</sup> group. **(M)** *BID* was significantly upregulated in the WT-Myc<sup>high</sup>, but not in the *MUT-Myc*, compared with the WT-Myc<sup>low</sup> group. **(N-P)** *MIR17HG*, *E2F1* and *EZH2* were upregulated in Myc<sup>high</sup> compared with Myc<sup>low</sup> groups irrespectively to the Myc mutation status. **(Q)** The WT-Myc<sup>high</sup> but not *MUT-Myc* group had significantly higher level of *CHUK/IKK1* mRNA compared with the WT-Myc<sup>low</sup> group. **(R-T)** The *IKBKB*, *NFKBIZ*, and *NFKBIA* mRNA levels appeared decreased in the *MUT-Myc* groups.

**Note:** Y-axes represent Log2 values of microarray expression data. Red asterisks \* indicate significant ( $P \leq 0.05$ ) upregulation and green asterisks \* indicate significant downregulation.

Between the *MUT-Myc*<sup>high</sup> and *MUT-Myc*<sup>low</sup> groups, there were no significant differences in *ICOS*, *CDKN2A*, *BCL2*, *PMAIP1*, *TP53*, *BCL2L11*, *BID*, *IKK1*, *IKBKB*, and *NFKBIZ* mRNA levels in Figures S4D, H-M and Q-S. In Figures S4C, *CTLA4* levels were lower in the *MUT-Myc*<sup>high</sup> than the *MUT-Myc*<sup>low</sup> group ( $P = 0.12$ ), but the *MUT-Myc*<sup>low</sup> group still had significant lower *CTLA4* levels than the WT-Myc<sup>low</sup> group ( $P = 0.026$ ).

**Supplementary Figure S5.** Differential expression of proteins (assessed by immunohistochemistry) between the *WT-Myc* and *MUT-Myc* groups. **(A-B)** The *MUT-Myc* group compared with the *WT-Myc* group had significantly increased CD10 and decreased nuclear p52/NF- $\kappa$ B2 expression levels. **(C-D)** The *MUT-Myc* compared with the WT-Myc<sup>high</sup> group had significantly lower levels of p53 and Ki-67. **(E)** Between the *MUT-Myc* group and the WT-Myc<sup>low/high</sup> groups, there were no significant difference in MDM2 levels. **(F)** Nuclear

expression of NF- $\kappa$ B subunit c-Rel was significantly lower in the *MUT-Myc* group compared with the WT-Myc<sup>low</sup> group. (G-I) Myc expression levels affect the levels of p53, Ki-67, and pAkt regardless Myc mutation status (the differences in Figure C-D may result from alteration in expression status). (J) Bcl-2 levels appeared to be decreased in the *MUT-Myc*<sup>high</sup> compared with the WT-Myc<sup>high</sup> group. (K-L) The *MUT-Myc* compared with *WT-Myc* group appeared to have increased p63 expression levels.

**Note:** Red asterisks \* indicate significant ( $P \leq 0.05$ ) upregulation and green asterisks \* indicate significant downregulation.

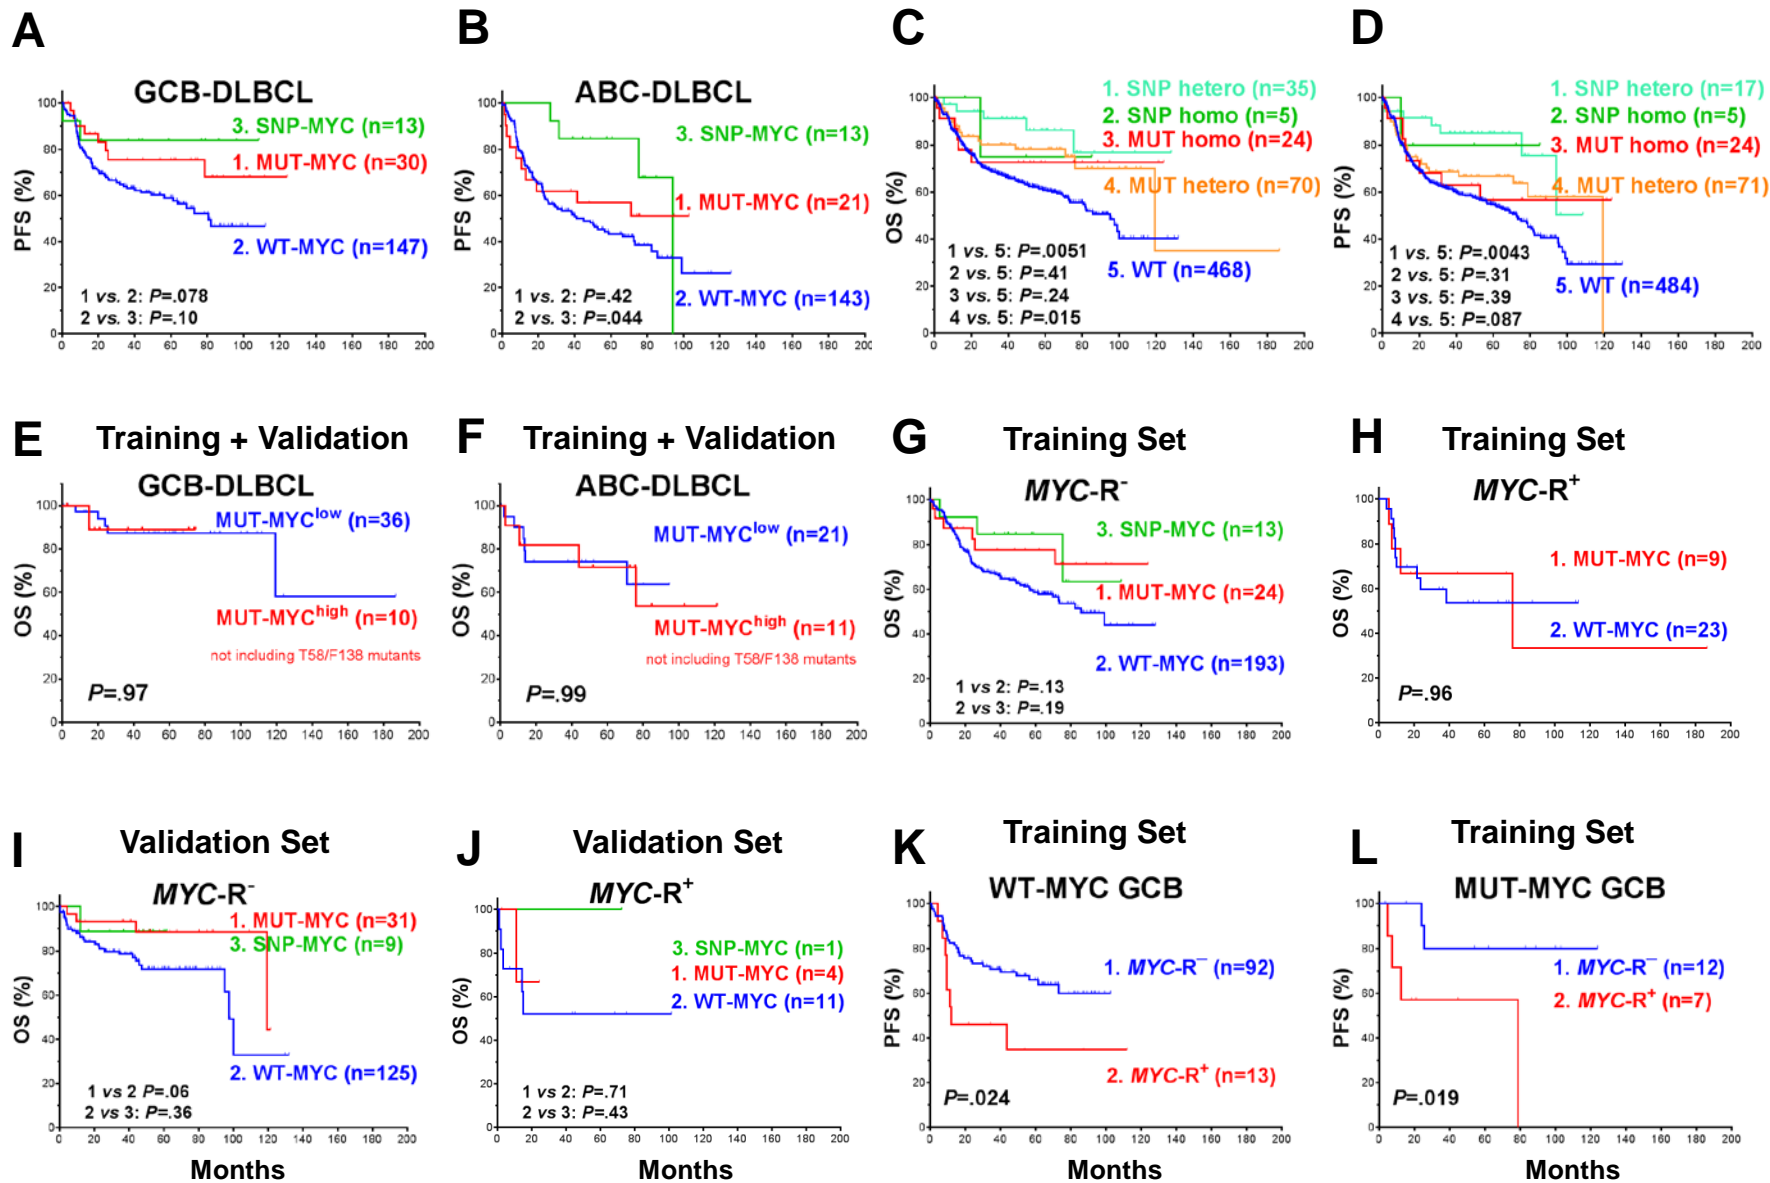

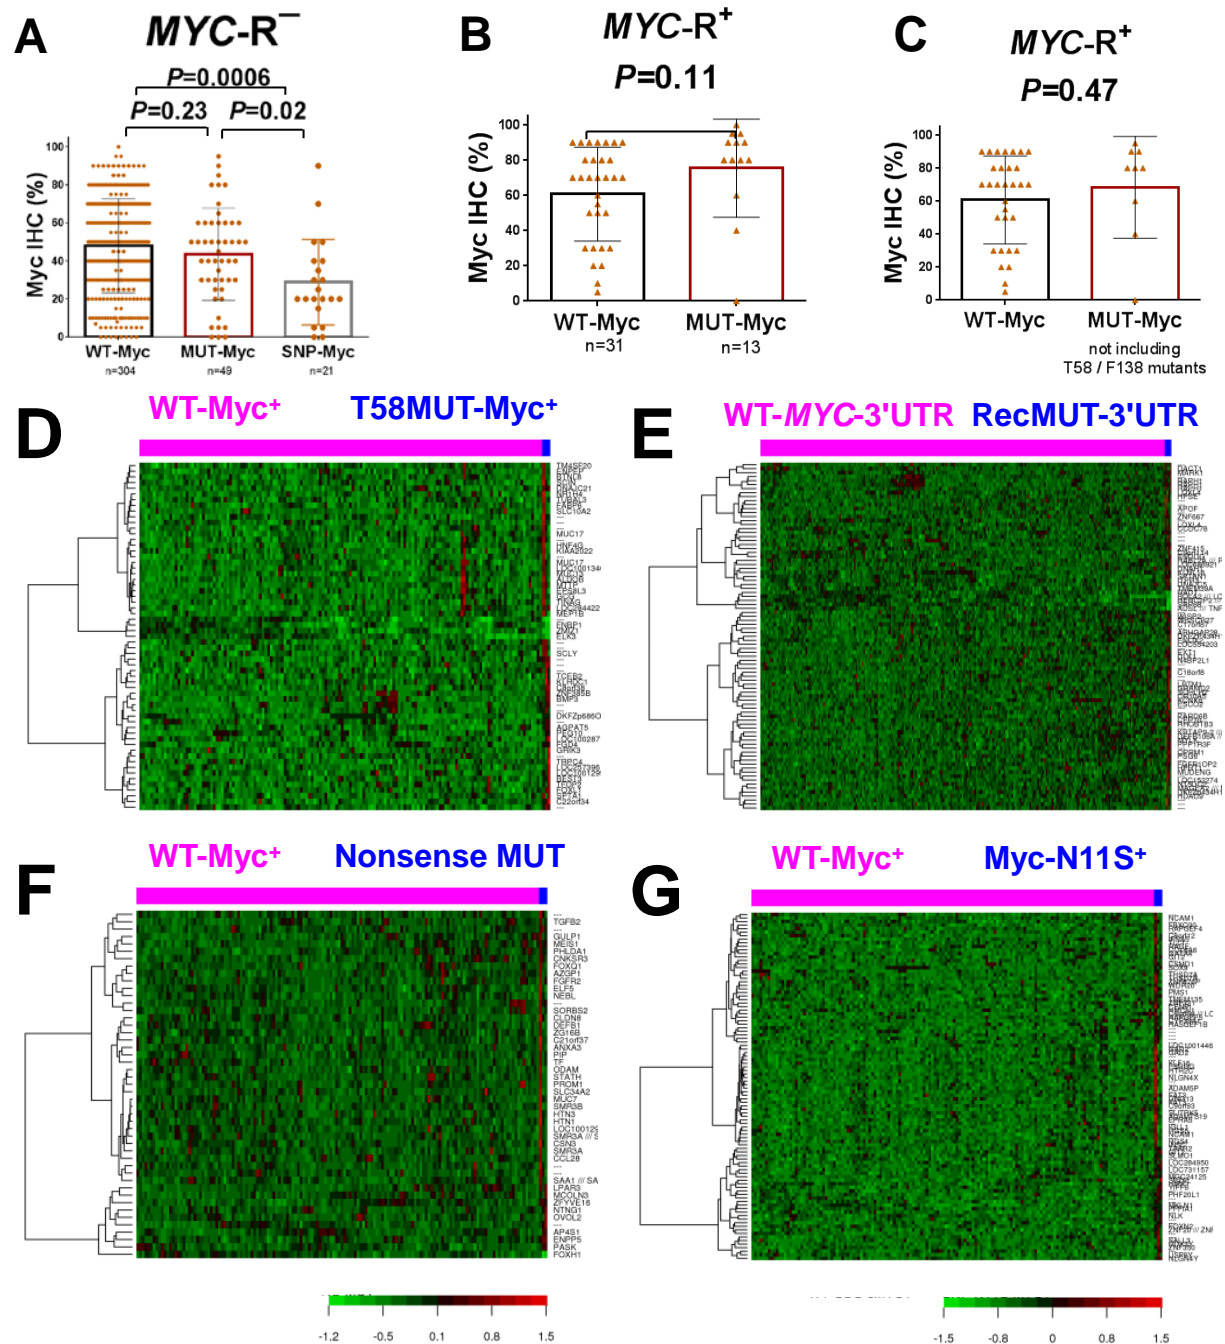

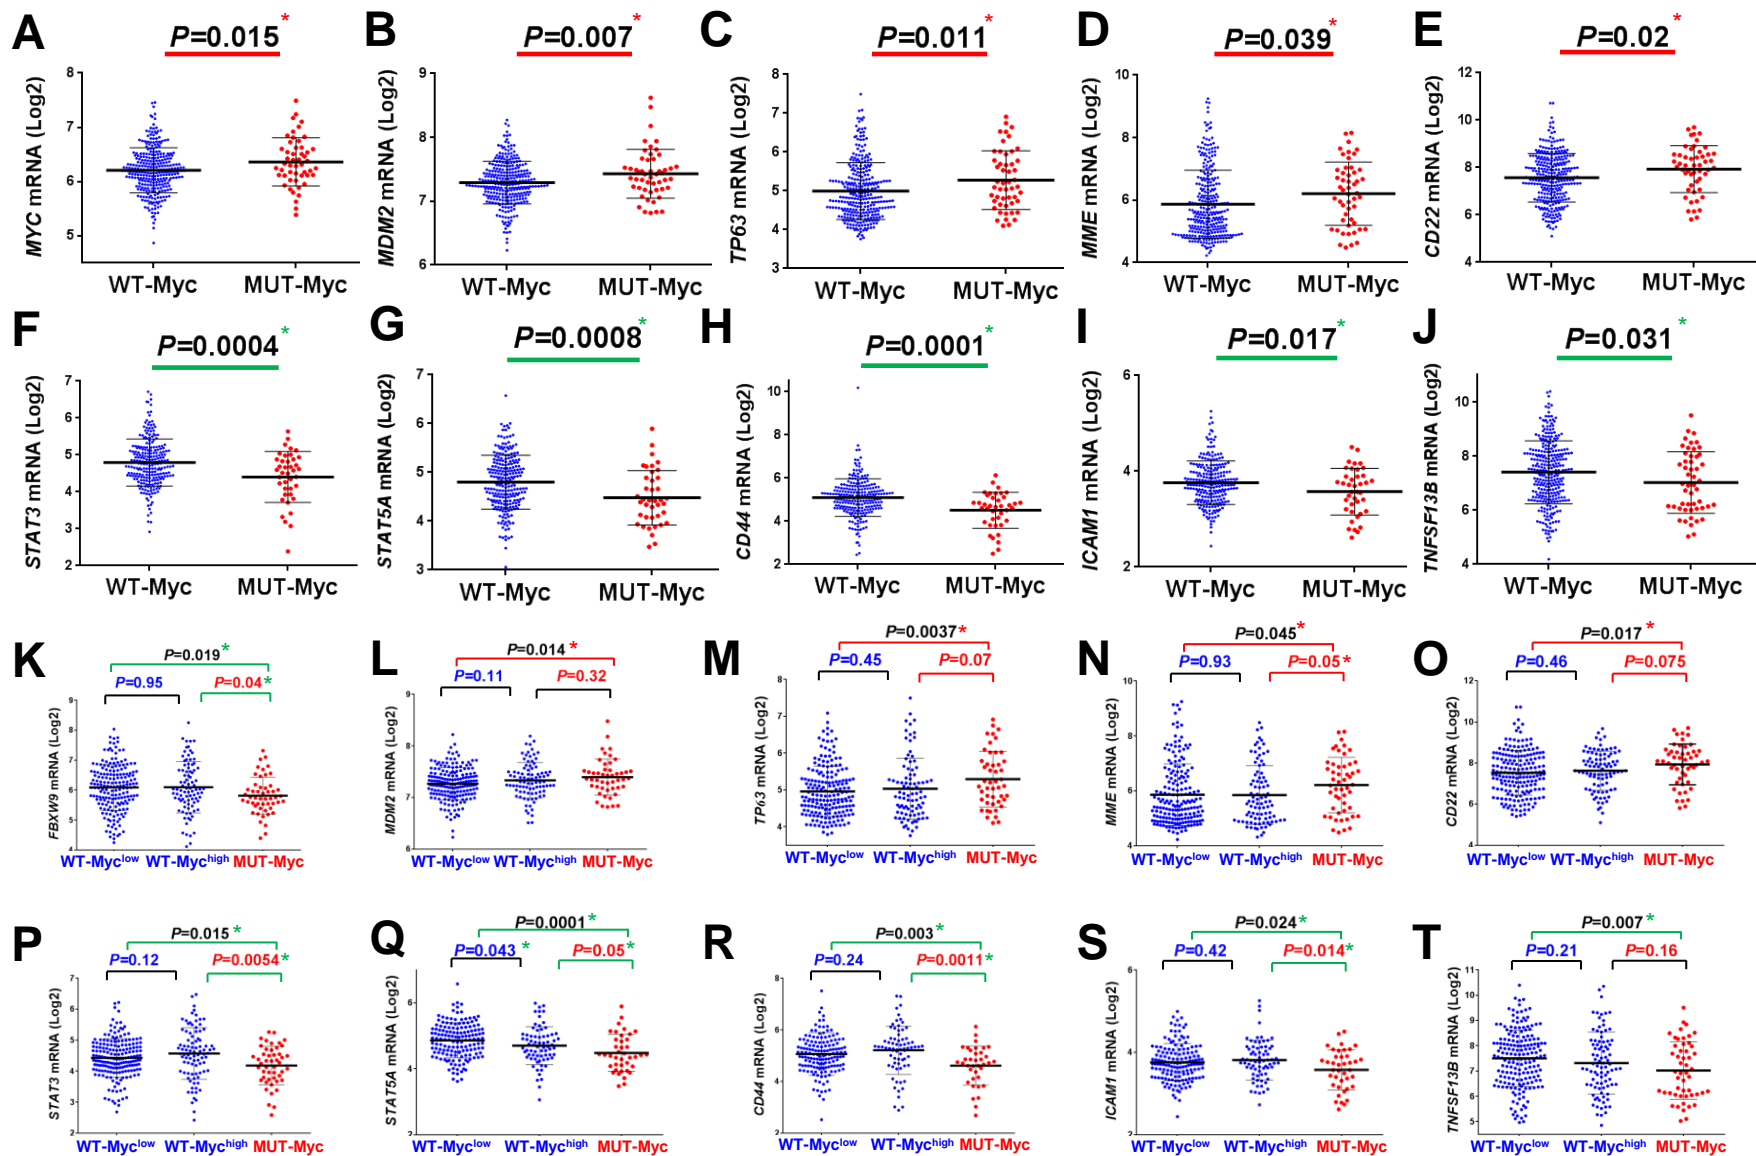



# Supplementary Fig. S4

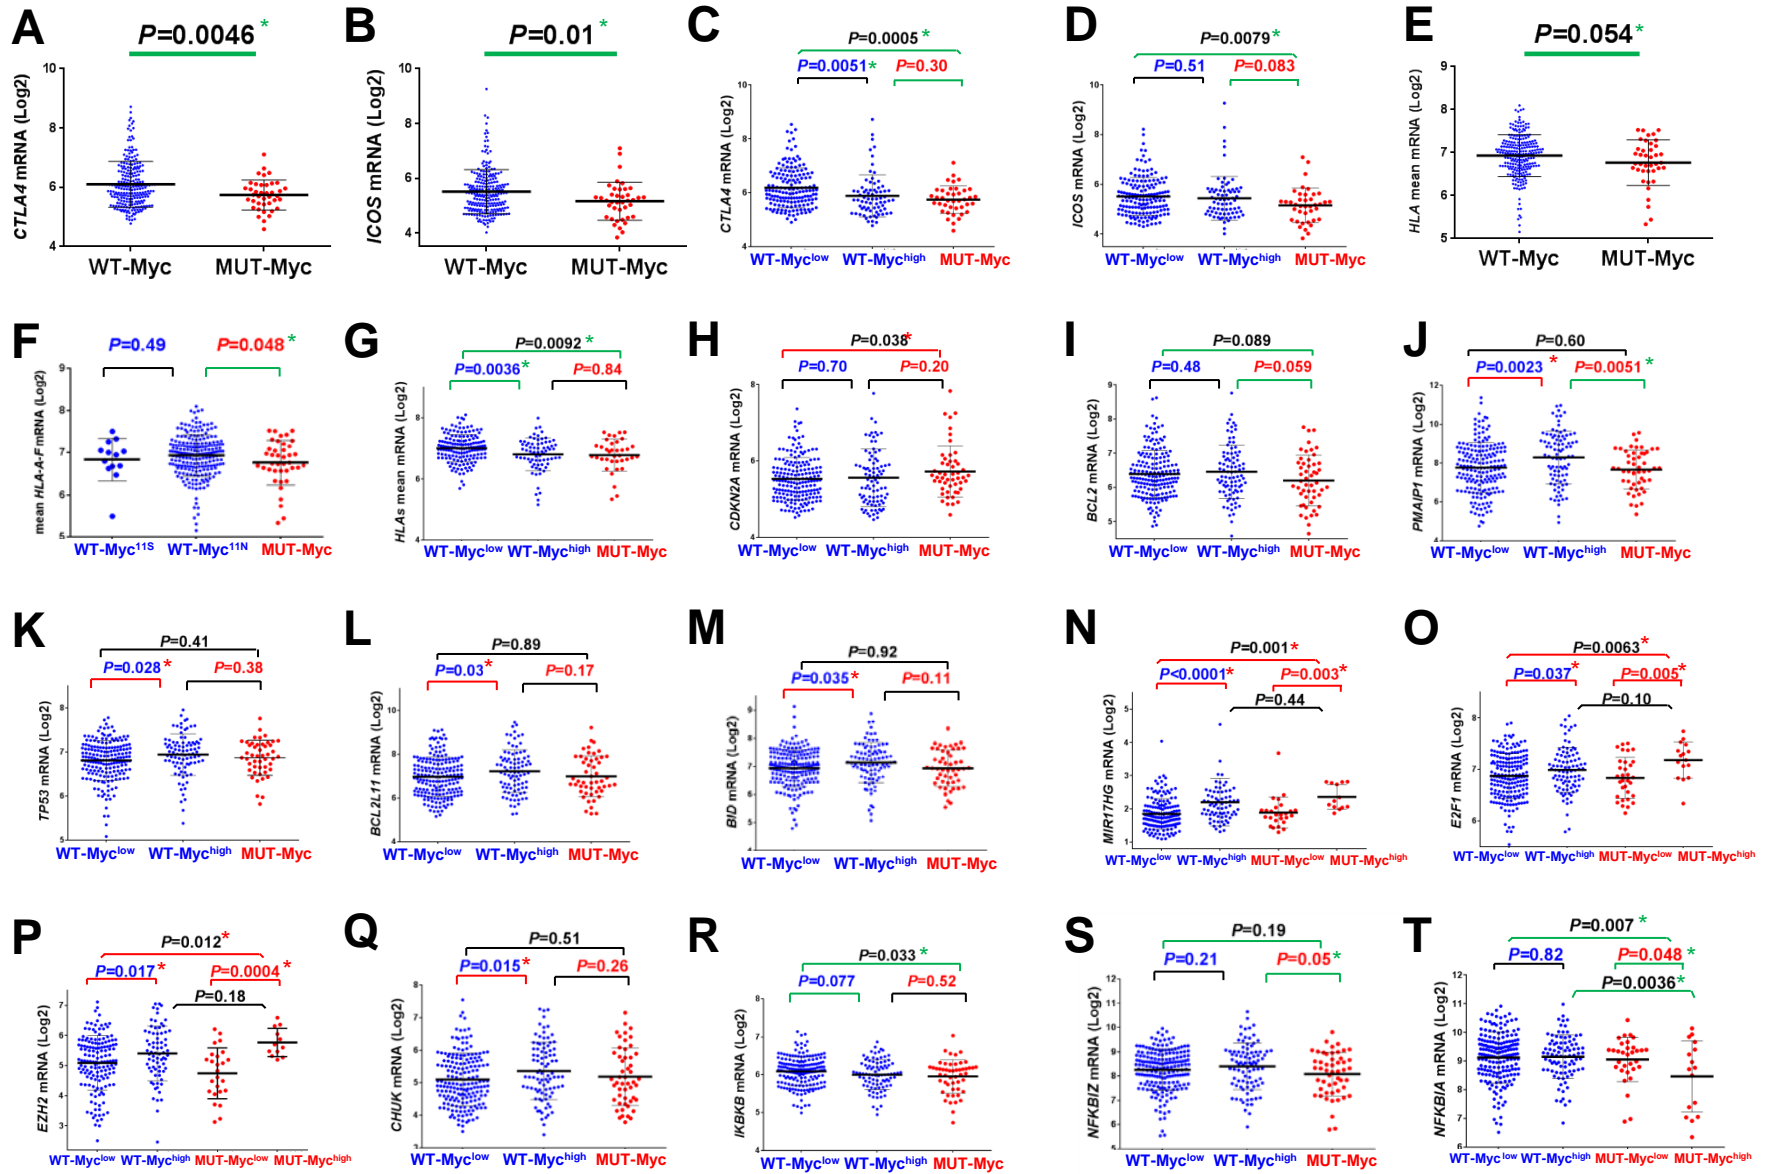

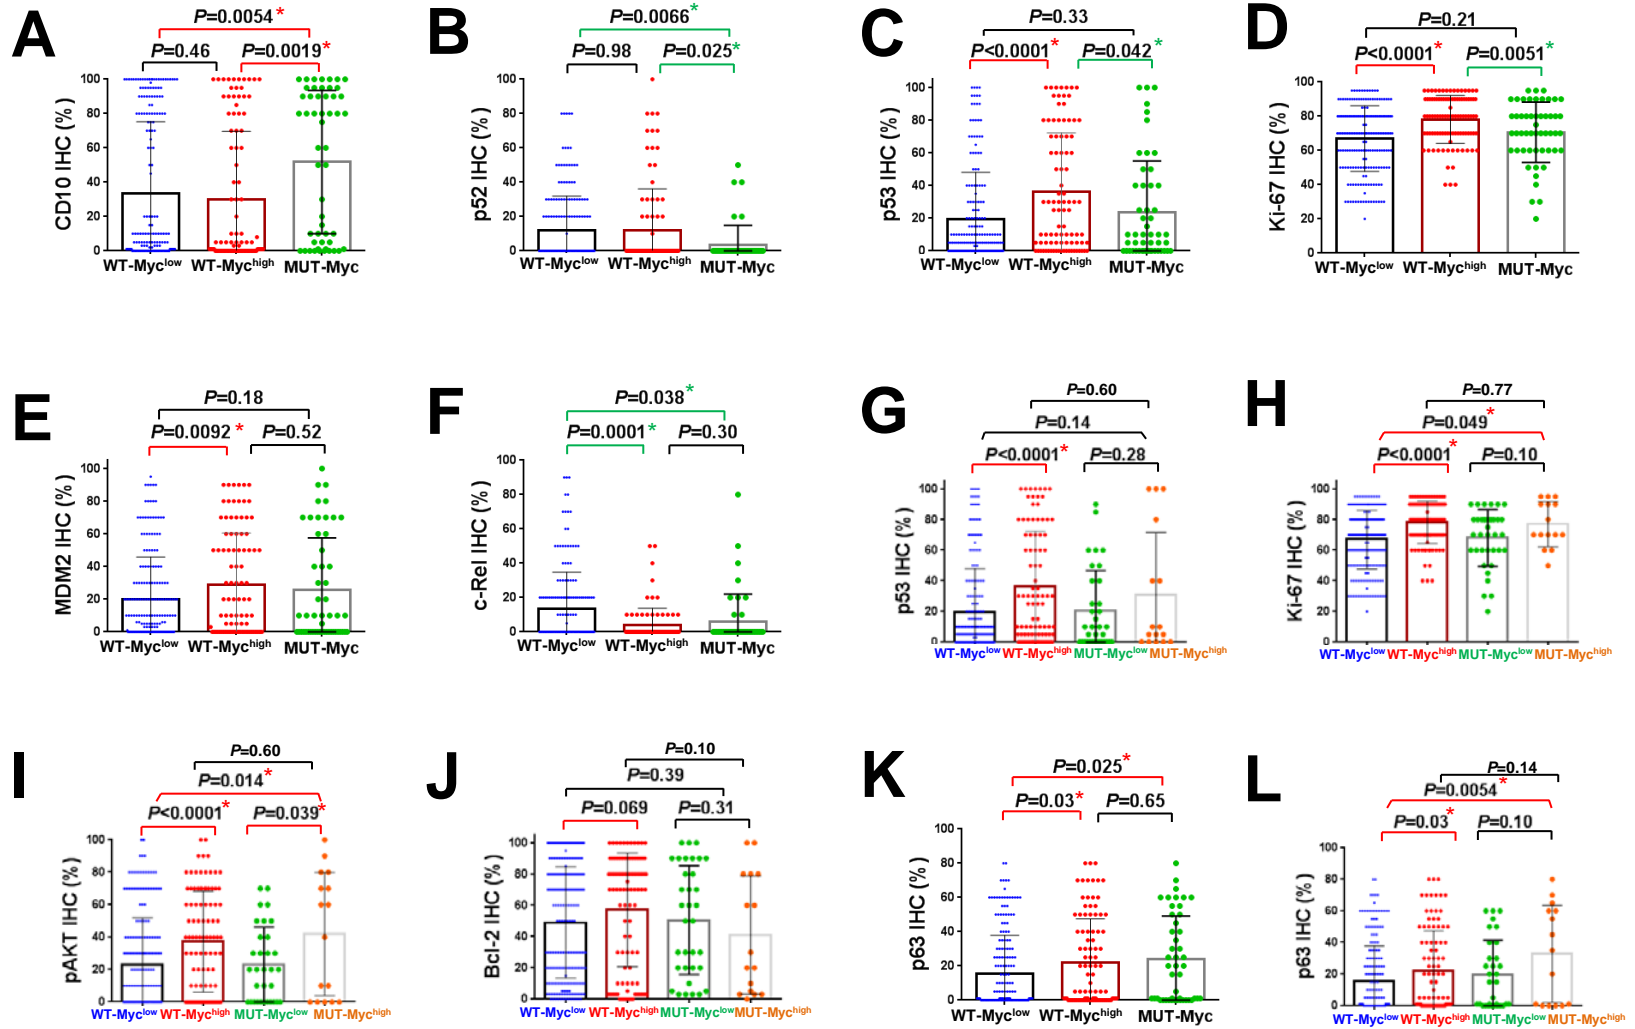

Supplement: NIHMS778498-supplement-1.pdf [file NIHMS778498-supplement-1.pdf]
